# Supplementary material
Source: PubMed Central journal article supplement (PMC5538291)
Supplement: 10.1194_M078097_jlr.M078097-1.pdf [file 10.1194_M078097_jlr.M078097-1.pdf]

**Supplemental Table S1a.** Oxylipins scanned but below the level of detection (<3 times baseline)

**Kidney**

*AA oxylipins*

COX: 15d-PGA<sub>2</sub>; 15k-PGD<sub>2</sub>; dhk-PGD<sub>2</sub>; Dihomo-15d-PGD<sub>2</sub>; 6k-PGE<sub>1</sub>; 19oh-PGE<sub>2</sub>; 20oh-PGE<sub>2</sub>; dhk-PGE<sub>2</sub>; bicyclo PGE<sub>2</sub>; 11β-PGE<sub>2</sub>; 15k-PGF<sub>1α</sub>; dh-PGF<sub>2α</sub>; 19oh-PGF<sub>2α</sub>; 20oh-PGF<sub>2α</sub>; 11β-PGF<sub>2α</sub>; 2,3-dinor-8-*iso*-PGF<sub>2α</sub>; 15k-PGF<sub>2α</sub>; dhk-PGF<sub>2α</sub>; 11β-PGF<sub>2α</sub>; 2,3-dinor-6k-PGF<sub>1α</sub>; tetranor-PGDM; tetranor-PGEM; tetranor-PGFM; PGJ<sub>2</sub>; 2,3-dinor-11β-PGF<sub>2α</sub>; PGK<sub>2</sub>; PGK<sub>1</sub>; 2,3-dinor-TXB<sub>2</sub>; 11-dehydro-TXB<sub>2</sub>; HXA<sub>3</sub>;  
LOX: 20oh-LTB<sub>4</sub>; 20cooh-LTB<sub>4</sub>; 12-epi-LTB<sub>4</sub>; 6t-12-epi-LTB<sub>4</sub>; 12-oxo-LTB<sub>4</sub>; LTC<sub>4</sub>; LTD<sub>4</sub>; LTE<sub>4</sub>; 6R-LXA<sub>4</sub>; 6S-LXA<sub>4</sub>; 15R-LXA<sub>4</sub>; 14,15-LTC<sub>4</sub> (EXC<sub>4</sub>); 14,15-LTD<sub>4</sub> (EXD<sub>4</sub>); 14,15-LTE<sub>4</sub> (EXE<sub>4</sub>); 6R-LXA<sub>4</sub>; LXB<sub>4</sub>;  
CYP: 20cooh-AA; 5,6-diHETE; 5,6-EpETrE; 8,9-EpETrE; 11,12-EpETrE; 14,15-EpETrE; 17-HETE; 19-HETE;

*Other oxylipins*

Dihomo-PGJ<sub>2</sub>; TXB<sub>1</sub>; PGD<sub>1</sub>; 9,10-EpOME; 12,13-EpOME; 12,13-EpODE; PGD<sub>3</sub>; 11-HEPE; RvE<sub>1</sub>; 14,15-EpETE; 17,18-EpETE; 16,17-EpDPE; 19,20-EpDPE; 17k-DPA; 7R-Maresin-1; RvD<sub>1</sub>; RvD<sub>2</sub>; 17k-DHA; 9-Nitrooleate; 10-Nitrooleate

**Liver**

*AA oxylipins*

COX: 15d-PGA<sub>2</sub>; PGB<sub>2</sub>; 12-HHTrE; HXA<sub>3</sub>; HXB<sub>3</sub>; 15k-PGD<sub>2</sub>; dhk-PGD<sub>2</sub>; 19oh-PGE<sub>2</sub>; 20oh-PGE<sub>2</sub>; 15k-PGE<sub>2</sub>; 11β-PGE<sub>2</sub>; dh-PGE<sub>2</sub>; dh-PGF<sub>2α</sub>; 19oh-PGF<sub>2α</sub>; 20oh-PGF<sub>2α</sub>; 2,3-dinor-11β-PGF<sub>2α</sub>; 11β-PGF<sub>2α</sub>; 15k-PGF<sub>2α</sub>; 11β-dhk-PGF<sub>2α</sub>; PGJ<sub>2</sub>; PGK<sub>2</sub>; 2,3-dinor-TXB<sub>2</sub>; 11-dehydro-TXB<sub>2</sub>; tetranor-PGDM; tetranor-PGEM; tetranor-PGFM;  
LOX: 20oh-LTB<sub>4</sub>; 20cooh-LTB<sub>4</sub>; 6t-LTB<sub>4</sub>; 12epi-LTB<sub>4</sub>; 6t, 12epi-LTB<sub>4</sub>; 12oxo-LTB<sub>4</sub>; LTC<sub>4</sub>; LTD<sub>4</sub>; LTE<sub>4</sub>; 14,15-LTC<sub>4</sub> (EXC<sub>4</sub>); 14,15-LTD<sub>4</sub> (EXD<sub>4</sub>); 14,15-LTE<sub>4</sub> (EXE<sub>4</sub>); 6R-LXA<sub>4</sub>; 15R-LXA<sub>4</sub>; LXA<sub>5</sub>; 6S-LXA<sub>4</sub>; LXB<sub>4</sub>; 5,15-DiHETE; 5,6 diHETE;  
CYP: 20cooh-AA; 5,6-EpETrE; 11,12-EpETrE; 14,15-EpETrE; 14,15-EpETE; 17,18-EpETE;

*Other oxylipins*

8-iso 15k-PGF<sub>2β</sub>; 2,3-dinor-8-*iso*-PGF<sub>2α</sub>; Dihomo-15d-PGD<sub>2</sub>; Dihomo-PGE<sub>2</sub>; Dihomo-PGJ<sub>2</sub>; PGD<sub>1</sub>; PGE<sub>1</sub>; 6k-PGE<sub>1</sub>; 6,15-dk-dh-PGF<sub>1α</sub>; 15k-PGF<sub>1α</sub>; Δ<sup>17</sup>-6k-PGF<sub>1α</sub>; 2,3-dinor-6k-PGF<sub>1α</sub>; PGK<sub>1</sub>; TXB<sub>1</sub>; 9,10-EpODE; 15,16-diHODE; 9,10-diHODE; 12,13-diHODE; 12,13-EpODE; 15,16-EpODE; 13-oxoOTrE; PGF<sub>3α</sub>; PGD<sub>3</sub>; 11-HEPE; 8-iso PGF<sub>3α</sub>; 7R-Maresin-1; 16,17-EpDPE; RvD<sub>2</sub>; RvD<sub>1</sub>; PD<sub>1</sub>; 15t-PD<sub>1</sub>; 17k-DHA; 17k-DPA; 9-Nitrooleate; 10-Nitrooleate

**Serum**

*AA oxylipins*

COX: 12-HHTrE; PGA<sub>2</sub>; 15d-PGA<sub>2</sub>; PGB<sub>2</sub>; 15k-PGD<sub>2</sub>; dhk-PGD<sub>2</sub>; 15d-PGD<sub>2</sub>; 20oh-PGE<sub>2</sub>; dhk-PGE<sub>2</sub>; 11β-PGE<sub>2</sub>; PGK<sub>2</sub>; bicyclo PGE<sub>2</sub>; 19oh-PGE<sub>2</sub>; 15k-PGF<sub>2α</sub>; dh-PGF<sub>2α</sub>; 11β-dhk-PGF<sub>2α</sub>; 19oh-PGF<sub>2α</sub>; 20oh-PGF<sub>2α</sub>; 2,3-dinor-11β-PGF<sub>2α</sub>; 15k-PGF<sub>2β</sub>; dhk-PGF<sub>2α</sub>; tetranor-PGDM; tetranor-PGEM; tetranor-PGFM; 2,3-dinor-TXB<sub>2</sub>; 11-dehydro-TXB<sub>2</sub>;  
LOX: HXA<sub>3</sub>; 20oh-LTB<sub>4</sub>; 20cooh-LTB<sub>4</sub>; 12-epi-LTB<sub>4</sub>; LXB<sub>4</sub>; 6t-LTB<sub>4</sub>; 12-epi-LTB<sub>4</sub>; 12-oxo-LTB<sub>4</sub>; LTC<sub>4</sub>; LTD<sub>4</sub>; LTE<sub>4</sub>; 14,15-LTC<sub>4</sub>(EXC<sub>4</sub>); 14,15-LTD<sub>4</sub>(EXD<sub>4</sub>); 14,15-LTE<sub>4</sub>(EXE<sub>4</sub>); 6R-LXA<sub>4</sub>; 6S-LXA<sub>4</sub>; 15R-LXA<sub>4</sub>; LXA<sub>5</sub>; 5,6 diHETE;  
CYP: 5,6 EpETrE; 14,15 EpETE; 16-HETE; 19-HETE; 20cooh-AA;

*Other oxylipins*

8-iso PGF<sub>2α</sub>III; 2,3-dinor-8-*iso*-PGF<sub>2α</sub>; 5-HETrE; Dihomo-PGD<sub>2</sub>; Dihomo-15d-PGD<sub>2</sub>; Dihomo-PGE<sub>2</sub>; Dihomo-PGF<sub>2α</sub>; 2,3-dinor-6k-PGF<sub>1α</sub>; TXB<sub>1</sub>; PGE<sub>1</sub>; 6,15-dk-dh-PGF<sub>1α</sub>; 15k-PGF<sub>1α</sub>; PGK<sub>1</sub>; 8-iso PGF<sub>3α</sub>; 15-oxoEDE; 9,10-DiHODE; 12,13-DiHODE; 15,16-EpODE; 13-oxoOTrE 9,10-EpODE; 15,16-DiHODE; PGD<sub>3</sub>; 11-HEPE; 9-HEPE; RvE<sub>1</sub>; 17k-DPA; RvD<sub>1</sub>; 15t-PD<sub>1</sub>; RvD<sub>2</sub>; 7R-Maresin-1; PD<sub>1</sub>; PDX; 17k-DHA; 9-Nitrooleate; 10-Nitrooleate;

**Supplemental Table S1b.** Oxylipins detected (>3 times baseline) but below the level of quantitation (< 5 times baseline)

**Kidney**

$\Delta^{17}$ -6k-PGF<sub>1 $\alpha$</sub> ; 6,15-dk-dh-PGF<sub>1 $\alpha$</sub> ; 11 $\beta$ -dhk-PGF<sub>2 $\alpha$</sub> ; LTB<sub>4</sub>; 6t-LTB<sub>4</sub>; 8-*iso*-PGF<sub>3 $\alpha$</sub> ; LXA<sub>5</sub>; PGE<sub>1</sub>; 12,13-DiHODE

**Liver**

8,9-EpETrE; Dihomo-PGD<sub>2</sub>

**Serum**

8,15-DiHETE; LTB<sub>4</sub>; 8,9-EpETrE

**Supplemental Table S2.** Oxylipin mass transitions, retention times, deuterated internal standards and response factors.

| Component Name                  | Mass Transition | Retention Time* | Deuterated Internal Standard          | Dose Response Factor |
|---------------------------------|-----------------|-----------------|---------------------------------------|----------------------|
| 12-HHTrE                        | 279.0 / 217.0   | 13.53           | 5-HETE-d <sub>8</sub>                 | 0.3646               |
| PGA <sub>2</sub>                | 333.0 / 271.0   | 9.68            | 15d-PGJ <sub>2</sub> -d <sub>4</sub>  | 11.454               |
| 15d-PGA <sub>2</sub>            | 315.0 / 271.0   | 15.19           | 15d-PGJ <sub>2</sub> -d <sub>4</sub>  | 2.6609               |
| PGB <sub>2</sub>                | 333.0 / 271.0   | 12.29           | 15d-PGJ <sub>2</sub> -d <sub>4</sub>  | 1.0891               |
| PGD <sub>2</sub>                | 351.0 / 271.0   | 7.78            | PGD <sub>2</sub> -d <sub>4</sub>      | 1.6144               |
| 15d-PGD <sub>2</sub>            | 333.0 / 271.0   | 11.81           | 15d-PGJ <sub>2</sub> -d <sub>4</sub>  | 29.722               |
| dhk-PGD <sub>2</sub>            | 351.0 / 207.0   | 9.15            | PGD <sub>2</sub> -d <sub>4</sub>      | 2.34                 |
| 15k-PGD <sub>2</sub>            | 349.0 / 235.0   | 8.64            | PGD <sub>2</sub> -d <sub>4</sub>      | No Primary           |
| tetranor-PGDM                   | 327.0 / 247.0   | 2.39            | PGD <sub>2</sub> -d <sub>4</sub>      | 0.0984               |
| PGE <sub>2</sub>                | 351.0 / 271.0   | 7.43            | PGE <sub>2</sub> -d <sub>4</sub>      | 7.8596               |
| 11β-PGE <sub>2</sub>            | 351.0 / 271.0   | 7.58            | PGE <sub>2</sub> -d <sub>4</sub>      | 4.9206               |
| 19oh PGE <sub>2</sub>           | 367.0 / 243.0   | 3.25            | PGE <sub>2</sub> -d <sub>4</sub>      | 0.3835               |
| bicyclo-PGE <sub>2</sub>        | 333.0 / 175.0   | 11.00 10.17     | PGE <sub>2</sub> -d <sub>4</sub>      | 0.7943               |
| 15k-PGE <sub>2</sub>            | 349.0 / 235.0   | 7.78            | PGE <sub>2</sub> -d <sub>4</sub>      | 1.3377               |
| 20oh-PGE <sub>2</sub>           | 367.0 / 175.0   | 3.15            | PGE <sub>2</sub> -d <sub>4</sub>      | No Primary           |
| dhk-PGE <sub>2</sub>            | 351.0 / 207.0   | 8.44            | PGE <sub>2</sub> -d <sub>4</sub>      | 0.529                |
| tetranor-PGEM                   | 327.0 / 291.0   | 2.30            | PGE <sub>2</sub> -d <sub>4</sub>      | 0.4032               |
| PGF <sub>2α</sub>               | 353.0 / 193.0   | 7.25            | PGF <sub>2α</sub> -d <sub>4</sub>     | 3.4181               |
| dhk-PGF <sub>2α</sub>           | 353.0 / 291.0   | 8.64            | dhk-PGF <sub>2α</sub> -d <sub>4</sub> | 4.9299               |
| dh-PGF <sub>2α</sub>            | 355.0 / 283.0   | 7.97            | PGF <sub>2α</sub> -d <sub>4</sub>     | No Primary           |
| 19oh-PGF <sub>2α</sub>          | 369.0 / 192.0   | 3.25            | PGF <sub>2α</sub> -d <sub>4</sub>     | No Primary           |
| 20oh-PGF <sub>2α</sub>          | 369.0 / 165.0   | 3.15            | PGF <sub>2α</sub> -d <sub>4</sub>     | No Primary           |
| 11β-dhk-PGF <sub>2α</sub>       | 353.0 / 113.0   | 8.20            | PGF <sub>2α</sub> -d <sub>4</sub>     | 0.8673               |
| 11β-PGF <sub>2α</sub>           | 353.0 / 335.0   | 6.74            | PGF <sub>2α</sub> -d <sub>4</sub>     | 0.1703               |
| 15k-PGF <sub>2α</sub>           | 351.0 / 219.0   | 7.68            | PGF <sub>2α</sub> -d <sub>4</sub>     | 0.6609               |
| 6k-PGF <sub>1α</sub>            | 369.0 / 245.0   | 5.34            | 6k-PGF <sub>1α</sub> -d <sub>4</sub>  | 3.6495               |
| 2,3-dinor-6k-PGF <sub>1α</sub>  | 363.0 / 281.0   | 6.60            | PGF <sub>2α</sub> -d <sub>4</sub>     | No Primary           |
| 2,3-dinor-11β-PGF <sub>2α</sub> | 325.0 / 227.0   | 5.40            | PGF <sub>2α</sub> -d <sub>4</sub>     | 1.2716               |
| tetranor-PGFM                   | 329.0 / 247.0   | 2.30            | PGF <sub>2α</sub> -d <sub>4</sub>     | No Primary           |
| PGJ <sub>2</sub>                | 333.0 / 189.0   | 9.87            | 15d-PGJ <sub>2</sub> -d <sub>4</sub>  | 3.6267               |
| 15d-PGJ <sub>2</sub>            | 315.0 / 203.0   | 14.57           | 15d-PGJ <sub>2</sub> -d <sub>4</sub>  | 1.4436               |
| PGK <sub>2</sub>                | 349.0 / 249.0   | 7.71            | PGE <sub>2</sub> -d <sub>4</sub>      | 1.8211               |
| TXB <sub>2</sub>                | 369.0 / 169.0   | 6.61            | TXB <sub>2</sub> -d <sub>4</sub>      | 6.3658               |
| 11d-TXB <sub>2</sub>            | 367.0 / 305.0   | 7.39            | TXB <sub>2</sub> -d <sub>4</sub>      | 2.375                |
| 2,3-dinor-TXB <sub>2</sub>      | 341.0 / 137.0   | 5.22            | TXB <sub>2</sub> -d <sub>4</sub>      | 0.3628               |
| 5-HETE                          | 319.0 / 115.0   | 17.19           | 5-HETE-d <sub>8</sub>                 | 1.169                |
| 5-oxoETE                        | 317.0 / 203.0   | 17.56           | 5-oxoETE-d <sub>7</sub>               | 0.8498               |
| 5,15-DiHETE                     | 335.0 / 201.0   | 11.46           | LTB <sub>4</sub> -d <sub>4</sub>      | 0.5267               |
| 5,6-DiHETE                      | 335.0 / 115.0   | 15.29           | LTB <sub>4</sub> -d <sub>4</sub>      | 0.4905               |
| 8-HETE                          | 319.0 / 155.0   | 16.71           | 5-HETE-d <sub>8</sub>                 | 2.311                |
| 8,15-DiHETE                     | 335.0 / 235.0   | 10.98           | LTB <sub>4</sub> -d <sub>4</sub>      | 0.1268               |
| 9-HETE                          | 319.0 / 123.0   | 16.84           | 5-HETE-d <sub>8</sub>                 | 0.2492               |
| 11-HETE                         | 319.0 / 167.0   | 16.41           | 5-HETE-d <sub>8</sub>                 | 5.3158               |
| 12-HETE                         | 319.0 / 135.0   | 16.6            | 15-HETE-d <sub>8</sub>                | 0.189                |
| Tetranor-12-HETE                | 265.0 / 109.0   | 13.28           | 15-HETE-d <sub>8</sub>                | 2.0436               |
| 12-oxoETE                       | 317.0 / 153.0   | 16.60           | 5-oxoETE-d <sub>7</sub>               | 1.5173               |
| 15-HETE                         | 319.0 / 175.0   | 16.07           | 15-HETE-d <sub>8</sub>                | 0.9018               |
| 15-oxoETE                       | 317.0 / 113.0   | 16.14           | 5-oxoETE-d <sub>7</sub>               | 2.2341               |
| HXA <sub>3</sub>                | 335.0 / 195.0   | 14.6            | LTB <sub>4</sub> -d <sub>4</sub>      | No Primary           |
| HXB <sub>3</sub>                | 335.0 / 183.0   | 14.8            | LTB <sub>4</sub> -d <sub>4</sub>      | No Primary           |
| LTB <sub>4</sub>                | 335.0 / 195.0   | 11.93           | LTB <sub>4</sub> -d <sub>4</sub>      | 1.2507               |
| 6t-LTB <sub>4</sub>             | 335.0 / 195.0   | 11.44           | LTB <sub>4</sub> -d <sub>4</sub>      | 0.9015               |
| 6t-12-epi-LTB <sub>4</sub>      | 335.0 / 195.0   | 11.58           | LTB <sub>4</sub> -d <sub>4</sub>      | 0.6674               |
| 12-epi-LTB <sub>4</sub>         | 335.0 / 195.0   | 11.89           | LTB <sub>4</sub> -d <sub>4</sub>      | 1.4375               |
| 12-oxo-LTB <sub>4</sub>         | 333.0 / 179.0   | 12.60           | LTB <sub>4</sub> -d <sub>4</sub>      | 1.4903               |

|                                            |               |       |                                      |            |
|--------------------------------------------|---------------|-------|--------------------------------------|------------|
| 20cooh-LTB <sub>4</sub>                    | 365.0 / 195.0 | 5.35  | LTB <sub>4</sub> -d <sub>4</sub>     | 0.1691     |
| 20oh-LTB <sub>4</sub>                      | 351.0 / 195.0 | 5.60  | LTB <sub>4</sub> -d <sub>4</sub>     | 0.6127     |
| LTC <sub>4</sub>                           | 624.0 / 272.0 | 10.75 | LTB <sub>4</sub> -d <sub>4</sub>     | 0.3364     |
| 14,15-LTC <sub>4</sub> (EXC <sub>4</sub> ) | 624.0 / 272.0 | 7.50  | LTB <sub>4</sub> -d <sub>4</sub>     | No Primary |
| LTD <sub>4</sub>                           | 495.0 / 177.0 | 9.19  | LTB <sub>4</sub> -d <sub>4</sub>     | 1.0476     |
| 14,15-LTD <sub>4</sub> (EXD <sub>4</sub> ) | 495.0 / 177.0 | 10.98 | LTB <sub>4</sub> -d <sub>4</sub>     | No Primary |
| LTE <sub>4</sub>                           | 438.0 / 333.0 | 10.57 | LTB <sub>4</sub> -d <sub>4</sub>     | 0.9368     |
| 14,15-LTE <sub>4</sub> (EXE <sub>4</sub> ) | 438.0 / 333.0 | 9.00  | LTB <sub>4</sub> -d <sub>4</sub>     | No Primary |
| 15(R)-LXA <sub>4</sub>                     | 351.0 / 165.0 | 8.50  | LTB <sub>4</sub> -d <sub>4</sub>     | No Primary |
| 6(R)-LXA <sub>4</sub>                      | 351.0 / 217.0 | 8.50  | LTB <sub>4</sub> -d <sub>4</sub>     | 0.1535     |
| 6(S)-LXA <sub>4</sub>                      | 351.0 / 115.0 | 8.78  | LTB <sub>4</sub> -d <sub>4</sub>     | 0.292      |
| LXB <sub>4</sub>                           | 351.0 / 221.0 | 7.58  | LTB <sub>4</sub> -d <sub>4</sub>     | 0.3733     |
| 20cooh-AA                                  | 333.0 / 271.0 | 14.38 | EPA-d <sub>5</sub>                   | 1.1049     |
| 5,6-EpETrE                                 | 319.0 / 191.0 | 18.13 | 11,12-DiHETrE-d <sub>11</sub>        | 3.7275     |
| 5,6-DiHETrE                                | 337.0 / 145.0 | 15.56 | 11,12-DiHETrE-d <sub>11</sub>        | 3.6065     |
| 8,9-EpETrE                                 | 319.0 / 155.0 | 17.90 | 8,9-DiHETrE-d <sub>11</sub>          | 1.2994     |
| 8,9-DiHETrE                                | 337.0 / 127.0 | 14.85 | 8,9-DiHETrE-d <sub>11</sub>          | 5.5366     |
| 11,12-EpETrE                               | 319.0 / 167.0 | 17.70 | 11,12-DiHETrE-d <sub>11</sub>        | 9.1336     |
| 11,12-DiHETrE                              | 337.0 / 167.0 | 14.27 | 11,12-DiHETrE-d <sub>11</sub>        | 16.4237    |
| 14,15-EpETrE                               | 319.0 / 175.0 | 17.24 | 14,15-DiHETrE-d <sub>11</sub>        | 1.0437     |
| 14,15-DiHETrE                              | 337.0 / 207.0 | 13.54 | 14,15-DiHETrE-d <sub>11</sub>        | 10.939     |
| 16-HETE                                    | 319.0 / 189.0 | 15.51 | 15-HETE-d <sub>8</sub>               | 0.5383     |
| 17-HETE                                    | 319.0 / 247.0 | 15.40 | 15-HETE-d <sub>8</sub>               | 3.0768     |
| 18-HETE                                    | 319.0 / 261.0 | 15.28 | 20-HETE-d <sub>6</sub>               | 3.2074     |
| 19-HETE                                    | 319.0 / 231.0 | 14.89 | 20-HETE-d <sub>6</sub>               | 0.2715     |
| 20-HETE                                    | 319.0 / 245.0 | 15.02 | 20-HETE-d <sub>6</sub>               | 0.3998     |
| 2,3-dinor-8- <i>iso</i> -PGF <sub>2α</sub> | 325.0 / 237.0 | 5.09  | PGF <sub>2α</sub> -d <sub>4</sub>    | 5.3857     |
| 5- <i>iso</i> -PGF <sub>2α</sub> VI        | 353.0 / 115.0 | 7.02  | PGF <sub>2α</sub> -d <sub>4</sub>    | 1.5803     |
| 8- <i>iso</i> -PGF <sub>2α</sub> III       | 353.0 / 193.0 | 6.50  | PGF <sub>2α</sub> -d <sub>4</sub>    | 1.9211     |
| 8- <i>iso</i> -15k-PGF <sub>2β</sub>       | 351.0 / 219.0 | 6.96  | PGF <sub>2α</sub> -d <sub>4</sub>    | 3.6218     |
| 9-HODE                                     | 295.0 / 171.0 | 15.95 | 9-HODE-d <sub>4</sub>                | 1.4704     |
| 9-oxoODE                                   | 293.0 / 185.0 | 16.28 | 5-oxoETE-d <sub>7</sub>              | 1.4353     |
| 13-HODE                                    | 295.0 / 195.0 | 15.8  | 13-HODE-d <sub>4</sub>               | 2.9546     |
| 13-oxoODE                                  | 293.0 / 167.0 | 15.96 | 5-oxoETE-d <sub>7</sub>              | 0.2717     |
| 9,10,13-TriHOME                            | 329.0 / 171.0 | 7.32  | 9-HODE-d <sub>4</sub>                | 3.1287     |
| 9,12,13-TriHOME                            | 329.0 / 211.0 | 7.19  | 9-HODE-d <sub>4</sub>                | 6.1871     |
| 9,10-EpOME                                 | 295.0 / 171.0 | 17.41 | 9,10-DiHOME-d <sub>4</sub>           | 3.7629     |
| 9,10-DiHOME                                | 313.0 / 201.0 | 13.22 | 9,10-DiHOME-d <sub>4</sub>           | 16.426     |
| 12,13-EpOME                                | 295.0 / 195.0 | 17.21 | 12,13-DiHOME-d <sub>4</sub>          | 10.516     |
| 12,13-DiHOME                               | 313.0 / 183.0 | 12.66 | 12,13-DiHOME-d <sub>4</sub>          | 11.798     |
| 15-oxoEDE                                  | 321.0 / 223.0 | 17.92 | 5-oxoETE-d <sub>7</sub>              | 1.1612     |
| 13-HOTrE-γ                                 | 293.0 / 193.0 | 14.89 | 13-HODE-d <sub>4</sub>               | 1.6998     |
| PGD <sub>1</sub>                           | 353.0 / 235.0 | 7.74  | PGD <sub>2</sub> -d <sub>4</sub>     | 1.0006     |
| PGE <sub>1</sub>                           | 353.0 / 235.0 | 7.67  | PGE <sub>2</sub> -d <sub>4</sub>     | 1.4269     |
| 6k-PGE <sub>1</sub>                        | 367.0 / 331.0 | 5.65  | PGE <sub>2</sub> -d <sub>4</sub>     | 0.9207     |
| PGF <sub>1α</sub>                          | 355.0 / 293.0 | 7.24  | PGF <sub>2α</sub> -d <sub>4</sub>    | 3.0675     |
| 15k-PGF <sub>1α</sub>                      | 353.0 / 221.0 | 7.68  | PGF <sub>2α</sub> -d <sub>4</sub>    | No Primary |
| 6,15-dk-dh-PGF <sub>1α</sub>               | 369.0 / 267.0 | 6.52  | PGF <sub>2α</sub> -d <sub>4</sub>    | 0.4899     |
| PGK <sub>1</sub>                           | 351.0 / 251.0 | 7.76  | PGD <sub>2</sub> -d <sub>4</sub>     | 4.2079     |
| TXB <sub>1</sub>                           | 371.0 / 171.0 | 6.33  | TXB <sub>2</sub> -d <sub>4</sub>     | 3.6782     |
| 5-HETrE                                    | 321.0 / 205.0 | 18.65 | 5-HETE-d <sub>8</sub>                | 0.2746     |
| 8-HETrE                                    | 321.0 / 157.0 | 17.12 | 5-HETE-d <sub>8</sub>                | 1.8141     |
| 15-HETrE                                   | 321.0 / 221.0 | 16.74 | 15-HETE-d <sub>8</sub>               | 2.9424     |
| Dihomo-PGD <sub>2</sub>                    | 379.0 / 299.0 | 9.70  | PGD <sub>2</sub> -d <sub>4</sub>     | No Primary |
| Dihomo-15d PGD <sub>2</sub>                | 361.0 / 299.0 | 14.08 | 15d-PGJ <sub>2</sub> -d <sub>4</sub> | No Primary |
| Dihomo-PGE <sub>2</sub>                    | 379.0 / 299.0 | 9.40  | PGE <sub>2</sub> -d <sub>4</sub>     | No Primary |
| Dihomo-PGF <sub>2α</sub>                   | 381.0 / 337.0 | 9.20  | PGF <sub>2α</sub> -d <sub>4</sub>    | 2.812      |
| Dihomo-PGJ <sub>2</sub>                    | 361.0 / 299.0 | 12.52 | 15d-PGJ <sub>2</sub> -d <sub>4</sub> | No Primary |
| 9-HOTrE                                    | 293.0 / 171.0 | 14.46 | 9-HODE-d <sub>4</sub>                | 2.006      |
| 9-oxoOTrE                                  | 291.0 / 185.0 | 14.98 | 5-oxoETE-d <sub>7</sub>              | 2.2547     |
| 13-HOTrE                                   | 293.4 / 195.0 | 14.59 | 13-HODE-d <sub>4</sub>               | 0.6216     |

|                                       |               |       |                                   |            |
|---------------------------------------|---------------|-------|-----------------------------------|------------|
| 13-oxoOTrE                            | 291.0 / 247.0 | 14.80 | 5-oxoETE-d <sub>7</sub>           | 0.0856     |
| 12,13-EpODE                           | 293.0 / 183.0 | 16.19 | 13-HODE-d <sub>4</sub>            | 2.4048     |
| 12,13-DiHODE                          | 311.0 / 183.0 | 11.12 | 12,13-DiHOME-d <sub>4</sub>       | 4.4379     |
| 15,16-EpODE                           | 293.0 / 235.0 | 15.49 | 12,13-DiHOME-d <sub>4</sub>       | No Primary |
| 15,16-DiHODE                          | 311.0 / 223.0 | 10.62 | 12,13-DiHOME-d <sub>4</sub>       | No Primary |
| 9,10-EpODE                            | 293.0 / 171.0 | 16.39 | 9,10-DiHOME-d <sub>4</sub>        | No Primary |
| 9,10-DiHODE                           | 311.0 / 201.0 | 11.62 | 9,10-DiHOME-d <sub>4</sub>        | No Primary |
| PGD <sub>3</sub>                      | 349.0 / 269.0 | 6.79  | PGD <sub>2</sub> -d <sub>4</sub>  | 0.5356     |
| PGE <sub>3</sub>                      | 349.0 / 269.0 | 6.52  | PGE <sub>2</sub> -d <sub>4</sub>  | 1.3408     |
| PGF <sub>3α</sub>                     | 351.0 / 193.0 | 6.27  | PGF <sub>2α</sub> -d <sub>4</sub> | 1.2284     |
| TXB <sub>3</sub>                      | 367.0 / 169.0 | 5.73  | TXB <sub>2</sub> -d <sub>4</sub>  | 5.4993     |
| Δ <sup>17</sup> -6k-PGF <sub>1α</sub> | 367.0 / 163.0 | 4.68  | PGF <sub>2α</sub> -d <sub>4</sub> | 2.0835     |
| 5-HEPE                                | 317.0 / 115.0 | 15.81 | 5-HETE-d <sub>8</sub>             | 1.1101     |
| 8-HEPE                                | 317.0 / 155.0 | 15.34 | 5-HETE-d <sub>8</sub>             | 1.1697     |
| 9-HEPE                                | 317.0 / 149.0 | 15.48 | 5-HETE-d <sub>8</sub>             | 0.6765     |
| 11-HEPE                               | 317.0 / 215.0 | 15.23 | 5-HETE-d <sub>8</sub>             | No Primary |
| 12-HEPE                               | 317.0 / 179.0 | 15.33 | 15-HETE-d <sub>8</sub>            | 1.7239     |
| 15-HEPE                               | 317.0 / 219.0 | 15.00 | 15-HETE-d <sub>8</sub>            | 1.8731     |
| LXA <sub>5</sub>                      | 349.0 / 215.0 | 7.32  | LTB <sub>4</sub> -d <sub>4</sub>  | 0.3762     |
| RvD <sub>1</sub>                      | 375.0 / 141.0 | 8.36  | LTB <sub>4</sub> -d <sub>4</sub>  | 0.5531     |
| 14,15-EpETE                           | 317.0 / 207.0 | 16.27 | 14,15-DiHETrE-d <sub>11</sub>     | 2.6835     |
| 17,18-EpETE                           | 317.0 / 259.0 | 15.88 | 14,15-DiHETrE-d <sub>11</sub>     | 1.8647     |
| 18-HEPE                               | 317.0 / 215.0 | 14.50 | 20-HETE-d <sub>6</sub>            | 1.3858     |
| RvE <sub>1</sub>                      | 349.0 / 195.0 | 5.51  | LTB <sub>4</sub> -d <sub>4</sub>  | 0.2271     |
| 8-iso-PGF <sub>3α</sub>               | 351.0 / 307.0 | 5.50  | PGF <sub>2α</sub> -d <sub>4</sub> | No Primary |
| 17k-DHA                               | 341.0 / 297.0 | 16.31 | LTB <sub>4</sub> -d <sub>4</sub>  | 1.1412     |
| 4-HDoHE                               | 343.0 / 101.0 | 17.37 | 5-HETE-d <sub>8</sub>             | 0.4409     |
| 7-HDoHE                               | 343.0 / 141.0 | 16.70 | 5-HETE-d <sub>8</sub>             | 0.5523     |
| 8-HDoHE                               | 343.0 / 109.0 | 16.77 | 5-HETE-d <sub>8</sub>             | 0.4476     |
| 10-HDoHE                              | 343.0 / 153.0 | 16.36 | 5-HETE-d <sub>8</sub>             | 2.1831     |
| 11-HDoHE                              | 343.0 / 149.0 | 16.50 | 5-HETE-d <sub>8</sub>             | 0.8501     |
| 13-HDoHE                              | 343.0 / 221.0 | 16.18 | 15-HETE-d <sub>8</sub>            | 0.603      |
| 14-HDoHE                              | 343.0 / 205.0 | 16.30 | 15-HETE-d <sub>8</sub>            | 0.7806     |
| 16-HDoHE                              | 343.0 / 233.0 | 16.00 | 15-HETE-d <sub>8</sub>            | 3.3544     |
| 17-HDoHE                              | 343.0 / 245.0 | 16.06 | 15-HETE-d <sub>8</sub>            | 0.2779     |
| 20-HDoHE                              | 343.0 / 241.0 | 15.72 | 20-HETE-d <sub>6</sub>            | 1.3316     |
| 7R-Maresin-1                          | 359.0 / 177.0 | 11.33 | LTB <sub>4</sub> -d <sub>4</sub>  | 0.2837     |
| PD <sub>1</sub>                       | 359.0 / 153.0 | 10.80 | LTB <sub>4</sub> -d <sub>4</sub>  | No Primary |
| 15t-PD <sub>1</sub>                   | 359.0 / 153.0 | 11.00 | LTB <sub>4</sub> -d <sub>4</sub>  | No Primary |
| 10S,17S-DiHDoHE<br>(PDX)              | 359.0 / 153.0 | 11.19 | LTB <sub>4</sub> -d <sub>4</sub>  | 1.0292     |
| RvD <sub>2</sub>                      | 375.0 / 175.0 | 7.64  | LTB <sub>4</sub> -d <sub>4</sub>  | 0.3639     |
| RvD <sub>5</sub>                      | 359.2 / 199.0 | 11.34 | LTB <sub>4</sub> -d <sub>4</sub>  | No Primary |
| 16,17-EpDPE                           | 343.0 / 193.0 | 17.36 | 14,15-DiHETrE-d <sub>11</sub>     | 0.2435     |
| 19,20-DiHDoPE                         | 361.0 / 229.0 | 13.31 | 14,15-DiHETrE-d <sub>11</sub>     | 1.1322     |
| 19,20-EpDPE                           | 343.0 / 241.0 | 16.91 | 14,15-DiHETrE-d <sub>11</sub>     | 2.2213     |
| 10-Nitrooleate                        | 326.0 / 169.0 | 19.65 | EPA-d <sub>5</sub>                | No Primary |
| 9-Nitrooleate                         | 326.0 / 168.0 | 19.65 | EPA-d <sub>5</sub>                | No Primary |

\*Retention times were based on retention times of primary standards if available. For those with no primary, the retention time was estimated based on comparisons of known and unknown retention time of oxylipins in our samples and the retention times of oxylipins reported by Dumlao DS, Buczynski MW, Norris PC, Harkewicz R, Dennis EA. High-throughput lipidomic analysis of fatty acid derived eicosanoids and N-acyl ethanolamines. *BBA-Mol Cell Biol L* 2011;1811(11):724-36. doi: 10.1016/j.bbaliip.2011.06.005, and by Wang Y, Armando AM, Quehenberger O, Yan C, Dennis EA. Comprehensive ultra-performance liquid chromatographic separation and mass spectrometric analysis of eicosanoid metabolites in human samples. *Journal of Chromatography A* 2014;1359:60-9. doi: 10.1016/j.chroma.2014.07.0006.

**Supplemental Table S3.** Body weights in rats given control, LA and LA+ALA diets for six weeks

| Week | Control               |          | LA       |          | LA+ALA   |          | Diet   | Sex |
|------|-----------------------|----------|----------|----------|----------|----------|--------|-----|
|      | Female                | Male     | Female   | Male     | Female   | Male     |        |     |
|      | grams (mean±SE) (n=6) |          |          |          |          |          |        |     |
| 0    | 118±2.95              | 128±5.11 | 113±3.05 | 128±2.83 | 115±3.43 | 128±4.92 | 0.0003 |     |
| 2    | 215±6.46              | 279±4.74 | 202±2.46 | 274±7.44 | 208±5.87 | 265±5.38 | <.0001 |     |
| 4    | 280±10.9              | 415±5    | 257±3.85 | 401±12.3 | 277±2.39 | 398±6.62 | <.0001 |     |
| 6    | 318±11.1              | 510±7.32 | 289±4.18 | 493±16.5 | 322±2.79 | 494±11.2 | <.0001 |     |

**Supplemental Table S4.** Distributions of oxylipin compared to precursor PUFA mass for all tissues and diets

| Tissue | Diet    | Sex    | Oxylipin /PUFA | % of total oxylipins/PUFA |      |                |     |     |      |
|--------|---------|--------|----------------|---------------------------|------|----------------|-----|-----|------|
|        |         |        |                | AA                        | LA   | Other n-6 PUFA | ALA | EPA | DHA  |
| Kidney | Control | Female | Oxylipin       | 29.4                      | 48.7 | 1.0            | 0.9 | 0.8 | 19.2 |
|        |         |        | Fatty Acid     | 66                        | 19.1 | 4.8            | 0.2 | 0.6 | 9.3  |
|        |         | Male   | Oxylipin       | 35.7                      | 48.4 | 1.3            | 1.1 | 1.2 | 12.3 |
|        |         |        | Fatty Acid     | 67.0                      | 22.0 | 5.8            | 0.2 | 0.5 | 4.7  |
|        | LA      | Female | Oxylipin       | 26.0                      | 61.4 | 1.1            | 0.6 | 0.6 | 10.4 |
|        |         |        | Fatty Acid     | 61.1                      | 25.5 | 6.5            | 0.3 | 0.3 | 6.4  |
|        |         | Male   | Oxylipin       | 32.1                      | 56.9 | 1.4            | 0.8 | 0.7 | 8.1  |
|        |         |        | Fatty Acid     | 64.4                      | 25.3 | 6.4            | 0.2 | 0.2 | 3.6  |
|        | LA+ALA  | Female | Oxylipin       | 21.5                      | 59.4 | 0.9            | 1.4 | 0.8 | 16.0 |
|        |         |        | Fatty Acid     | 58.0                      | 28.0 | 5.1            | 0.5 | 0.7 | 7.8  |
|        |         | Male   | Oxylipin       | 24.3                      | 62.5 | 1.1            | 1.9 | 0.8 | 9.3  |
|        |         |        | Fatty Acid     | 62.1                      | 28.0 | 5.1            | 0.4 | 0.4 | 4.1  |
| Liver  | Control | Female | Oxylipin       | 43.2                      | 33.1 | 2.6            | 1.5 | 1.4 | 18.2 |
|        |         |        | Fatty Acid     | 55.0                      | 13.1 | 6.9            | 0.1 | 0.7 | 24.1 |
|        |         | Male   | Oxylipin       | 44.0                      | 32.8 | 3.7            | 1.4 | 1.5 | 16.6 |
|        |         |        | Fatty Acid     | 53.7                      | 18.2 | 10.9           | 0.2 | 0.7 | 16.4 |
|        | LA      | Female | Oxylipin       | 29.7                      | 54.8 | 2.4            | 2.2 | 0.8 | 10.0 |
|        |         |        | Fatty Acid     | 56.6                      | 17.4 | 7.5            | 0.1 | 0.2 | 18.3 |
|        |         | Male   | Oxylipin       | 32.2                      | 56.2 | 2.2            | 1.7 | 0.6 | 7.1  |
|        |         |        | Fatty Acid     | 56.7                      | 20.9 | 11.1           | 0.2 | 0.3 | 10.9 |
|        | LA+ALA  | Female | Oxylipin       | 26.3                      | 56.1 | 1.9            | 2.7 | 1.3 | 11.8 |
|        |         |        | Fatty Acid     | 52.1                      | 18.7 | 6.9            | 0.2 | 0.8 | 21.4 |
|        |         | Male   | Oxylipin       | 28.6                      | 53.6 | 2.1            | 4.2 | 1.8 | 9.7  |
|        |         |        | Fatty Acid     | 52.1                      | 23.8 | 9.6            | 0.3 | 0.7 | 13.6 |
| Serum  | Control | Female | Oxylipin       | 81.0                      | 11.9 | 0.4            | 0.8 | 1.1 | 4.9  |
|        |         |        | Fatty Acid     | 52.6                      | 32.7 | 3.4            | 1.6 | 0.7 | 9.1  |
|        |         | Male   | Oxylipin       | 81.5                      | 11.4 | 0.6            | 0.7 | 1.7 | 4.2  |
|        |         |        | Fatty Acid     | 41.7                      | 44.5 | 4.9            | 2.7 | 0.7 | 5.5  |
|        | LA      | Female | Oxylipin       | 75.3                      | 19.2 | 0.4            | 0.6 | 1.0 | 3.5  |
|        |         |        | Fatty Acid     | 39.0                      | 49.5 | 4.2            | 1.5 | 0.2 | 5.6  |
|        |         | Male   | Oxylipin       | 75.3                      | 19.4 | 0.5            | 0.6 | 0.8 | 3.4  |
|        |         |        | Fatty Acid     | 37.3                      | 52.3 | 5.0            | 1.6 | 0.1 | 3.7  |
|        | LA+ALA  | Female | Oxylipin       | 73.1                      | 16.5 | 0.4            | 1.8 | 2.0 | 6.2  |
|        |         |        | Fatty Acid     | 39.6                      | 46.4 | 2.6            | 3.1 | 0.6 | 7.7  |
|        |         | Male   | Oxylipin       | 76.0                      | 16.0 | 0.4            | 1.3 | 1.9 | 4.4  |
|        |         |        | Fatty Acid     | 36.5                      | 51.6 | 3.5            | 3.9 | 0.4 | 4.2  |

**Supplemental Table S5a.** Kidney n-6 Oxylipins in Rats Given Control, LA and LA+ALA Diets for Six Weeks

| Diet<br>Sex                       | Control                 |                         | LA                       |                         | LA+ALA                   |                        | Diet    | Sex                 |
|-----------------------------------|-------------------------|-------------------------|--------------------------|-------------------------|--------------------------|------------------------|---------|---------------------|
|                                   | Female                  | Male                    | Female                   | Male                    | Female                   | Male                   |         |                     |
| <i>ARA oxylipins</i>              |                         |                         |                          |                         |                          |                        |         |                     |
| <i>ng/g tissue</i>                |                         |                         |                          |                         |                          |                        |         |                     |
| <b>PGD<sub>2</sub></b>            | 235±33.1                | 299±56.9                | 286±40.1                 | 305±27.2                | 289±71.7                 | 356±44.7               |         |                     |
| <b>15d-PGD<sub>2</sub></b>        | 32.1±4.20 <sup>B</sup>  | 45.8±12.5               | 101±21.9 <sup>A</sup>    | 96.1±15.1               | 37.8±17.5 <sup>AB</sup>  | 83.5±25.5              | 0.0087  |                     |
| <b>15d-PGJ<sub>2</sub></b>        | 40.2±4.87               | 55.3±6.92               | 61.9±13.0                | 97.0±10.7               | 37.8±17.5                | 61.9±21.0              |         | 0.0369              |
| <b>PGE<sub>2</sub></b>            | 263±40.8                | 231±38.9                | 256±21.4                 | 218±28.3                | 241±54.3                 | 240±37.1               |         |                     |
| <b>15k-PGE<sub>2</sub></b>        | 13.5±2.52 <sup>c</sup>  | 28.0±5.88 <sup>b</sup>  | 21.2±2.45 <sup>b</sup>   | 29.2±1.40 <sup>ba</sup> | 12.5±1.71 <sup>c</sup>   | 39.9±5.59 <sup>a</sup> |         | 0.0346 <sup>†</sup> |
| <b>PGA<sub>2</sub></b>            | 140±34.7                | 142±11.8                | 164±32.6                 | 162±17.1                | 164±35.0                 | 126±33.8               |         |                     |
| <b>PGF<sub>2α</sub></b>           | 203±21.2                | 269±33.4                | 272±54.8                 | 230±32.8                | 253±48.1                 | 221±32.6               |         |                     |
| <b>6k-PGF<sub>1α</sub></b>        | 184±19.1                | 219±35.2                | 210±32.3                 | 216±20.8                | 214±74.3                 | 189±20.5               |         |                     |
| <b>TXB<sub>2</sub></b>            | 168±36.4                | 145±17.7                | 145±5.77                 | 140±11.5                | 133±27.8                 | 151±10.1               |         |                     |
| <b>12-HHTrE</b>                   | 1487±248                | 1435±195                | 1792±203                 | 1388±134                | 1708±140                 | 1548±156               |         |                     |
| <b>5-HETE</b>                     | 3174±303 <sup>d</sup>   | 4095±233 <sup>abc</sup> | 3846±245 <sup>bcd</sup>  | 5095±376 <sup>a</sup>   | 3479±422 <sup>cd</sup>   | 4967±587 <sup>ab</sup> |         | 0.0235              |
| <b>5,15-DIHETE</b>                | 152±22.5 <sup>B</sup>   | 178±17.3                | 224±33.7 <sup>A</sup>    | 247±31.5                | 154±23.5 <sup>BA</sup>   | 228±27.0               | 0.0423  |                     |
| <b>5-oxoETE</b>                   | 524±86.6                | 690±60.9                | 643±161                  | 1079±245                | 399±72.7                 | 715±110                |         | 0.0147              |
| <b>8-HETE</b>                     | 200±24.7 <sup>B</sup>   | 230±18.0                | 275±24.5 <sup>A</sup>    | 301±26.6                | 274±38.2 <sup>BA</sup>   | 265±36.7               | 0.0416  |                     |
| <b>8,15-DIHETE</b>                | 2493±301                | 2795±328                | 2811±253                 | 3160±285                | 2703±380                 | 3801±534               |         |                     |
| <b>9-HETE</b>                     | 882±31.3 <sup>B</sup>   | 1184±78.7               | 1330±134 <sup>A</sup>    | 1879±323                | 1284±132 <sup>A</sup>    | 1578±239               | 0.0092  | 0.0201              |
| <b>11-HETE</b>                    | 1004±141                | 971±152                 | 1317±73.9                | 1508±207                | 1186±152                 | 1181±202               |         |                     |
| <b>12-HETE</b>                    | 1196±86.3 <sup>B</sup>  | 1588±198                | 1845±252 <sup>A</sup>    | 3178±743                | 2116±457 <sup>A</sup>    | 2964±588               | 0.0113  | 0.0259              |
| <b>12-oxoETE</b>                  | 35.0±6.95 <sup>B</sup>  | 40.1±8.03               | 63.5±15.8 <sup>A</sup>   | 93.2±18.7               | 31.5±5.39 <sup>B</sup>   | 53.9±14.2              | 0.0032  |                     |
| <b>tetranor-12-HETE</b>           | 1.92±0.878 <sup>B</sup> | 3.97±0.48               | 3.93±0.60 <sup>A</sup>   | 7.50±1.28               | 2.50±0.42 <sup>B</sup>   | 4.49±0.42              | 0.0030  | 0.0004              |
| <b>HXB<sub>3</sub>*</b>           | 0.58±0.17               | 0.61±0.14               | 0.80±0.27                | 1.04±0.19               | 0.50±0.086               | 1.08±0.25              |         |                     |
| <b>15-HETE</b>                    | 3296±330 <sup>B</sup>   | 3117±689                | 4748±242 <sup>A</sup>    | 5231±645                | 4071±715 <sup>BA</sup>   | 4641±934               | 0.0404  |                     |
| <b>15-oxoETE</b>                  | 275±62.0                | 421±98.8                | 396±80.6                 | 632±156                 | 260±59.3                 | 472±101                |         | 0.0278              |
| <b>16-HETE</b>                    | 458±43.1 <sup>b</sup>   | 629±44.3 <sup>ab</sup>  | 623±49.4 <sup>ab</sup>   | 845±46.6 <sup>ab</sup>  | 548±94.1 <sup>ab</sup>   | 889±175 <sup>a</sup>   | 0.0030  |                     |
| <b>20-HETE</b>                    | 77.3±25.5               | 37.5±7.73               | 74.8±24.6                | 35.3±3.13               | 70.0±21.0                | 52.0±9.72              |         | 0.0409              |
| <b>5,6-DIHETrE</b>                | 56.4±10.8 <sup>ab</sup> | 63.0±12.5 <sup>ab</sup> | 53.4±8.79 <sup>ab</sup>  | 80.9±13.9 <sup>a</sup>  | 93.9±23.2 <sup>a</sup>   | 43.6±15.7 <sup>b</sup> |         | 0.0474              |
| <b>8,9-DIHETrE</b>                | 19.4±3.40               | 19.8±3.06               | 16.2±1.58                | 21.8±1.87               | 17.0±2.18                | 19.3±1.94              |         |                     |
| <b>11,12-DiHETrE</b>              | 57.6±16.6               | 39.8±4.97               | 41.9±3.75                | 41.3±2.96               | 41.3±4.90                | 44.4±5.59              |         |                     |
| <b>14,15-DiHETrE</b>              | 39.8±6.02               | 41.0±4.47               | 46.7±3.34                | 57.0±5.87               | 42.7±2.93                | 57.3±7.79              |         |                     |
| <b>5-iso-PGF<sub>2α</sub>VI</b>   | 202±35.0 <sup>B</sup>   | 295±21.9                | 279±35.3 <sup>A</sup>    | 408±20.0                | 235.7±47.7 <sup>AB</sup> | 394±38.4               | 0.0247  | <0.0001             |
| <b>8-iso-PGF<sub>2α</sub>III</b>  | 170±17.9                | 231±20.5                | 235±21.1                 | 279±26.6                | 207±36.8                 | 280±25.8               |         | 0.0081              |
| <b>8-iso-15k PGF<sub>2β</sub></b> | 14.6±2.04 <sup>B</sup>  | 28.8±4.09               | 28.7±8.38 <sup>A</sup>   | 38.0±2.58               | 23.0±3.83 <sup>A</sup>   | 37.2±2.76              | 0.0135  | 0.0002              |
| <b>Sum</b>                        | 17093±438 <sup>B</sup>  | 19569±690               | 22212±1257 <sup>A</sup>  | 27211±2453              | 20359±1977 <sup>A</sup>  | 25190±2868             | 0.0048  | 0.0132              |
| <i>LA oxylipins</i>               |                         |                         |                          |                         |                          |                        |         |                     |
| <b>9-HODE</b>                     | 8525±854 <sup>B</sup>   | 9166±1551               | 17446±2051 <sup>A</sup>  | 18129±1480              | 19507±3460 <sup>A</sup>  | 23348±3492             | <0.0001 |                     |
| <b>9-oxoODE</b>                   | 273±21.6 <sup>B</sup>   | 529±71.9                | 820±234 <sup>A</sup>     | 980±178                 | 657±175 <sup>B</sup>     | 463±110                | 0.0037  |                     |
| <b>13-HODE</b>                    | 4674±592 <sup>B</sup>   | 5741±838                | 11940±1152 <sup>A</sup>  | 12237±1286              | 12059±1621 <sup>A</sup>  | 15816±2780             | <0.0001 |                     |
| <b>13-oxoODE</b>                  | 670±85.1 <sup>B</sup>   | 1426±292                | 1751±222 <sup>A</sup>    | 2523±503                | 1632±461 <sup>A</sup>    | 2550±737               | 0.0440  | 0.0408              |
| <b>9,12,13-TriHOME</b>            | 14013±6206 <sup>B</sup> | 9482±878                | 20325±5860 <sup>AB</sup> | 14096±2265              | 22343±7529 <sup>A</sup>  | 22026±4010             | 0.0232  |                     |
| <b>9,10-DiHOME</b>                | 114±40.2                | 64.1±6.19               | 130±16.4                 | 124±16.4                | 124±14.1                 | 153±28.7               |         |                     |
| <b>12,13-DiHOME</b>               | 80.8±20.7 <sup>B</sup>  | 80.5±12.7               | 105±10.0 <sup>AB</sup>   | 124±11.8                | 124±9.58 <sup>A</sup>    | 165±26.0               | 0.0032  |                     |
| <b>Sum</b>                        | 28349±5963 <sup>B</sup> | 26489±2472              | 52517±7923 <sup>A</sup>  | 48213±4251              | 56264±8999 <sup>A</sup>  | 64703±9591             | <0.0001 |                     |
| <i>GLA oxylipin</i>               |                         |                         |                          |                         |                          |                        |         |                     |
| <b>13-HOTrE-γ</b>                 | 78.0±6.05 <sup>B</sup>  | 102±19.8                | 187±32.1 <sup>A</sup>    | 237±54.1                | 142±19.5 <sup>A</sup>    | 208±30.3               | 0.0027  |                     |
| <i>DGLA oxylipins</i>             |                         |                         |                          |                         |                          |                        |         |                     |
| <b>PGF<sub>1α</sub></b>           | 40.2±2.22               | 48.1±4.54               | 40.0±6.05                | 48.5±8.23               | 32.4±4.86                | 42.0±3.95              |         |                     |
| <b>8-HETrE</b>                    | 101±12.6                | 177±8.94                | 155±14.2                 | 189±29.4                | 166±26.4                 | 207±28.3               |         | 0.0103              |
| <b>15-HETrE</b>                   | 276±23.2 <sup>B</sup>   | 326±27.5                | 435±37.1 <sup>A</sup>    | 563±116                 | 407±83.6 <sup>A</sup>    | 551±113                | 0.0200  |                     |
| <b>Sum</b>                        | 417±33.2                | 551±29.1                | 630±51.6                 | 800±149                 | 504±137                  | 800±141                |         | 0.0352              |
| <i>EDA oxylipin</i>               |                         |                         |                          |                         |                          |                        |         |                     |
| <b>15-oxoEDE</b>                  | 11.9±2.12 <sup>B</sup>  | 14.8±1.85               | 25.5±6.30 <sup>A</sup>   | 34.7±5.39               | 19.1±4.50 <sup>B</sup>   | 31.9±5.43              | 0.0036  | 0.0360              |
| <i>AdA oxylipins</i>              |                         |                         |                          |                         |                          |                        |         |                     |
| <b>Dihomo-PGD<sub>2</sub>*</b>    | 0.023±0.001             | 0.041±0.007             | 0.045±0.002              | 0.060±0.009             | 0.035±0.008              | 0.133±0.084            |         |                     |
| <b>Dihomo-PGE<sub>2</sub>*</b>    | 0.050±0.024             | 0.050±0.015             | 0.056±0.003              | 0.072±0.013             | 0.036±0.008              | 0.058±0.012            |         |                     |
| <b>Dihomo-PGF<sub>2α</sub></b>    | 55.9±15.6 <sup>B</sup>  | 66.7±9.21               | 86.3±12.1 <sup>A</sup>   | 108±14.3                | 53.9±11.4 <sup>BA</sup>  | 81.3±6.42              | 0.0087  | 0.0185              |
| <b>Sum n-6</b>                    | 46006±6112 <sup>B</sup> | 46792±2861              | 75658±8214 <sup>A</sup>  | 76604±4830              | 77444±10846 <sup>A</sup> | 91015±12067            | <0.0001 |                     |

Differing UPPER case superscript letters shown on the female values within a row indicate differences between diets. Differing lower case superscript letters within a row indicate differences between means.

Shading: higher or lower than control; female or male higher in at least one of the diets.

†P values listed across diet and sex are the P value for diet×sex interaction or for Wilcoxin's test P value if the data were not normally distributed.

\*Denotes no primary standard so not quantified. Values are not included in the sums. Values are mean±SE (n=5-6 for each), and are based on dry tissue weight.



**Supplemental Table S5b.** Kidney n-3 Oxylipins in Rats Given Control, LA and LA+ALA Diets for Six Weeks

| Diet<br>Sex          | Control                 |                       | LA                     |                       | High LA+ALA             |                        | Effect  |         |
|----------------------|-------------------------|-----------------------|------------------------|-----------------------|-------------------------|------------------------|---------|---------|
|                      | Female                  | Male                  | Female                 | Male                  | Female                  | Male                   | Diet    | Sex     |
| <i>ng/g tissue</i>   |                         |                       |                        |                       |                         |                        |         |         |
| <i>ALA oxylipins</i> |                         |                       |                        |                       |                         |                        |         |         |
| 9-HOTrE              | 347±62.8 <sup>B</sup>   | 347±42.2              | 289±58.3 <sup>B</sup>  | 345±59.5              | 719±90.4 <sup>A</sup>   | 1111±282               | <0.0001 |         |
| 9-oxoOTrE            | 32.5±3.04               | 70.9±11.2             | 47.8±7.15              | 84.9±22.1             | 43.5±8.58               | 151±51.6               |         | 0.0018  |
| 13-HOTrE             | 156±13.0 <sup>B</sup>   | 192±26.7              | 206±50.6 <sup>B</sup>  | 245±49.5              | 507±73.8 <sup>A</sup>   | 739±166                | <0.0001 |         |
| 12,13-EpODE          | 58.2±6.40 <sup>B</sup>  | 67.2±9.13             | 69.0±13.8 <sup>B</sup> | 69.4±12.7             | 156±14.3 <sup>A</sup>   | 205±37.9               | <0.0001 |         |
| Sum                  | 535±72.4 <sup>B</sup>   | 609±71.8              | 542±105 <sup>B</sup>   | 674±106               | 1270±153 <sup>A</sup>   | 2001±440               | <0.0001 |         |
| <i>EPA oxylipins</i> |                         |                       |                        |                       |                         |                        |         |         |
| PGE <sub>3</sub>     | 23.1±4.28 <sup>AB</sup> | 24.6±4.01             | 18.0±2.53 <sup>B</sup> | 22.3±2.14             | 27.2±4.80 <sup>A</sup>  | 33.5±4.47              | 0.0406  |         |
| PGF <sub>3α</sub>    | 20.1±5.37               | 6.49±0.81             | 23.7±5.16              | 4.75±0.69             | 19.5±4.30               | 7.03±1.00              |         | <0.0001 |
| 5-HEPE               | 144±11.8                | 251±30.0              | 159±20.2               | 263±79.5              | 230±33.7                | 288±36.6               |         | 0.0091  |
| 9-HEPE               | 48.1±11.6 <sup>B</sup>  | 60.2±7.77             | 37.5±8.45 <sup>B</sup> | 52.6±8.54             | 85.1±8.83 <sup>A</sup>  | 76.8±12.0              | 0.0029  |         |
| 12-HEPE              | 51.5±5.85 <sup>B</sup>  | 75.1±9.28             | 50.6±7.25 <sup>B</sup> | 70.4±14.8             | 114±12.5 <sup>A</sup>   | 145±22.3               | <0.0001 | 0.0393  |
| 15-HEPE              | 50.8±4.06 <sup>B</sup>  | 65.6±6.16             | 50.7±3.89 <sup>B</sup> | 67.7±10.9             | 93.8±9.9 <sup>A</sup>   | 111±19.1               | 0.0005  |         |
| 18-HEPE              | 138±19.5 <sup>B</sup>   | 146±30.7              | 136±8.72 <sup>B</sup>  | 96.4±13.3             | 230±35.4 <sup>A</sup>   | 209±39.3               | 0.0026  |         |
| Sum                  | 475±75.9 <sup>B</sup>   | 629±15.3              | 476±64.9 <sup>B</sup>  | 577±39.5              | 800±68.4 <sup>A</sup>   | 870±64                 | 0.0001  |         |
| <i>DHA oxylipins</i> |                         |                       |                        |                       |                         |                        |         |         |
| 4-HDoHE              | 2065±236 <sup>BA</sup>  | 1834±219              | 1572±82.3 <sup>B</sup> | 1599±207              | 2733±410 <sup>A</sup>   | 2357±500               | 0.0195  |         |
| 7-HDoHE              | 274±28.4 <sup>ab</sup>  | 155±7.88 <sup>b</sup> | 206±5.79 <sup>ab</sup> | 230±71.1 <sup>b</sup> | 374±54.8 <sup>a</sup>   | 202±15.7 <sup>ab</sup> |         | 0.0048† |
| 8-HDoHE              | 465±31.3 <sup>B</sup>   | 270±31.3              | 341±26.6 <sup>B</sup>  | 309±28.9              | 591±90.1 <sup>A</sup>   | 353±34.0               | 0.0135  | 0.0001  |
| 10-HDoHE             | 396±65.5 <sup>B</sup>   | 181±16.0              | 295±30.0 <sup>B</sup>  | 193±26.5              | 532±94.6 <sup>A</sup>   | 271±41.1               | 0.0133  | <0.0001 |
| 11-HDoHE             | 514±52.2 <sup>B</sup>   | 324±25.7              | 393±20.4 <sup>B</sup>  | 327±25.1              | 723±85.4 <sup>A</sup>   | 445±65.5               | 0.0006  | 0.0003  |
| 13-HDoHE             | 836±142 <sup>BA</sup>   | 394±50.9              | 622±62.8 <sup>B</sup>  | 425±73.0              | 1048±151 <sup>A</sup>   | 591±97.0               | 0.0210  | 0.0001  |
| 14-HDoHE             | 1150±129 <sup>B</sup>   | 692±107               | 917±91.0 <sup>B</sup>  | 838±135               | 1721±201 <sup>A</sup>   | 1239±239               | 0.0015  | 0.0181  |
| 16-HDoHE             | 563±85.8 <sup>B</sup>   | 275±27.9              | 456±35.7 <sup>B</sup>  | 364±69.5              | 769±84.4 <sup>A</sup>   | 439±68.2               | 0.0089  | 0.0001  |
| 17-HDoHE             | 1834±308 <sup>B</sup>   | 781±189               | 1609±207 <sup>B</sup>  | 1403±351              | 2779±278 <sup>A</sup>   | 1550±381               | 0.0220  | 0.0023  |
| 20-HDoHE             | 3019±257 <sup>B</sup>   | 1798±185              | 2449±430 <sup>B</sup>  | 1467±195              | 3854±218 <sup>A</sup>   | 2104±232               | 0.0020  | <0.0001 |
| 19,20-DiHDoPE        | 72.0±18.2 <sup>A</sup>  | 26.6±4.17             | 33.4±4.79 <sup>B</sup> | 20.0±2.10             | 55.9±5.47 <sup>A</sup>  | 27.5±1.60              | 0.0108  | <0.0001 |
| Sum                  | 11194±1021 <sup>B</sup> | 6734±686              | 8902±705 <sup>B</sup>  | 6839±715              | 15199±1235 <sup>A</sup> | 9591±1288              | 0.0002  | <0.0001 |
| Sum n-3              | 12204±1002 <sup>B</sup> | 7972±663              | 9920±722 <sup>B</sup>  | 8090±717              | 17268±1110 <sup>A</sup> | 12461±1601             | <0.0001 | 0.0002  |

Differing UPPER case superscript letters shown on the female values within a row indicate differences between diets. Differing lower case superscript letters within a row indicate differences between means.

Shading: higher or lower than control; female or male higher in at least one of the diets.

†P values listed across diet and sex are the P value for diet×sex interaction or for Wilcoxin's test P value if the data were not normally distributed.

Values are mean±SE (n=5-6 for each), and are based on dry tissue weight.

**Supplemental Table S6a.** Liver n-6 Oxylipins in Rats Given Control, LA and LA+ALA Diets for Six Weeks

| Diet<br>Sex                 | Control                 |                        | LA                       |                         | LA+ALA                  |                         | Diet    | Sex                 |
|-----------------------------|-------------------------|------------------------|--------------------------|-------------------------|-------------------------|-------------------------|---------|---------------------|
|                             | Female                  | Male                   | Female                   | Male                    | Female                  | Male                    |         |                     |
| <i>ng/g tissue</i>          |                         |                        |                          |                         |                         |                         |         |                     |
| <i>AA oxylipins</i>         |                         |                        |                          |                         |                         |                         |         |                     |
| PGD <sub>2</sub>            | 354±84.2 <sup>AB</sup>  | 533±71.3               | 514±105 <sup>A</sup>     | 471±43.1                | 244±36.8 <sup>B</sup>   | 399±46.9                | 0.0239  | 0.0181              |
| 15d-PGD <sub>2</sub>        | 21.4±6.47               | 34.0±3.92              | 26.3±5.31                | 45.8±8.03               | 13.8±2.87               | 31.4±3.77               |         | 0.0007              |
| 15d-PGJ <sub>2</sub>        | 43.4±11.3 <sup>B</sup>  | 17.8±10.9              | 91.8±12.7 <sup>A</sup>   | 84.7±9.55               | 51.3±10.4 <sup>A</sup>  | 80.6±13.0               | 0.0001  |                     |
| PGE <sub>2</sub>            | 166±34.4                | 247±29.5               | 211±34.6                 | 239±16.2                | 121±15.8                | 226±34.8                |         | 0.0051              |
| bicyclo-PGE <sub>2</sub>    | 10.7±3.98 <sup>B</sup>  | 10.6±4.25              | 65.8±20.1 <sup>A</sup>   | 41.3±11.4               | 42.6±11.8 <sup>A</sup>  | 56.8±27.7               | 0.0010  |                     |
| PGA <sub>2</sub>            | 33.4±10.4 <sup>bc</sup> | 20.2±13.1 <sup>c</sup> | 82.4±15.0 <sup>a</sup>   | 33.1±8.13 <sup>bc</sup> | 33.5±3.66 <sup>bc</sup> | 58.2±13.0 <sup>ba</sup> |         | 0.0130 <sup>†</sup> |
| PGF <sub>2α</sub>           | 242±49.9                | 186±15.4               | 260±13.6                 | 203±21.2                | 166±22.5                | 168±18.1                |         |                     |
| 6k-PGF <sub>1α</sub>        | 8.04±0.73 <sup>B</sup>  | 9.00±0.40              | 9.50±1.41 <sup>A</sup>   | 15.4±1.04               | 6.19±1.04 <sup>A</sup>  | 11.8±1.85               | 0.0038  | 0.0001              |
| TXB <sub>2</sub>            | 27.2±3.76               | 36.8±4.77              | 32.0±3.02                | 42.4±5.23               | 22.4±3.57               | 35.1±5.19               |         | 0.0051              |
| 5-HETE                      | 1021±300                | 1377±176               | 1401±322                 | 1825±246                | 786±95.3                | 1489±329                |         | 0.0089              |
| 5-oxoETE                    | 135±33.9                | 87.8±9.63              | 179±44.5                 | 205±49.4                | 129±25.6                | 143±34.4                |         |                     |
| 8-HETE                      | 177±48.5 <sup>B</sup>   | 151±24.1               | 287±59.2 <sup>A</sup>    | 235±39.3                | 103±12.8 <sup>B</sup>   | 199±47.4                | 0.0167  |                     |
| 8,15-DiHETE                 | 494±133                 | 731±83.7               | 828±268                  | 985±179                 | 550±80.3                | 880±240                 |         |                     |
| 9-HETE                      | 636.8±200 <sup>AB</sup> | 746±126                | 1031±209 <sup>A</sup>    | 948±156                 | 434±54.3 <sup>B</sup>   | 797±198                 | 0.0466  |                     |
| 11-HETE                     | 461±158                 | 457±81.2               | 644±135                  | 428±100                 | 315±117                 | 425±133                 |         |                     |
| 12-HETE                     | 3891±1122               | 2892±614               | 3689±1663                | 3072±657                | 2517±350                | 3666±1104               |         |                     |
| tetranor-12-HETE            | 11.6±2.33               | 3.24±0.840             | 23.5±8.22                | 7.89±2.38               | 12.0±3.04               | 7.93±2.67               |         | 0.0076              |
| 12-oxoETE                   | 24.6±4.85 <sup>B</sup>  | 16.8±2.24              | 39.0±5.48 <sup>A</sup>   | 30.6±5.08               | 27.3±3.33 <sup>B</sup>  | 20.7±4.07               | 0.0073  | 0.0275              |
| 15-HETE                     | 1795±503                | 2471±602               | 1737±357                 | 2189±243                | 1657±212                | 2372±419                |         |                     |
| 15-oxoETE                   | 40.9±12.8 <sup>B</sup>  | 30.3±4.64              | 61.4±11.9 <sup>A</sup>   | 63.0±10.6               | 42.3±8.55 <sup>B</sup>  | 38.0±6.72               | 0.0109  |                     |
| LTB <sub>4</sub>            | -# <sup>b</sup>         | - <sup>b</sup>         | 7.62±1.85 <sup>b</sup>   | 7.19±1.02 <sup>a</sup>  | 6.20±0.99 <sup>a</sup>  | 7.12±1.28 <sup>a</sup>  |         | 0.0002              |
| 16-HETE                     | 3689±534                | 3080±390               | 4138±1038                | 3542±682                | 3909±875                | 3768±876                |         |                     |
| 17-HETE                     | 54.5±4.44               | 52.9±7.71              | 52.3±11.8                | 53.9±8.83               | 50.8±11.2               | 68.7±13.2               |         |                     |
| 19-HETE                     | 115±22.9                | 430±89.7               | 230±82.3                 | 427±108                 | 138±11.3                | 363±73.7                |         | 0.0003              |
| 20-HETE                     | 45.5±9.54 <sup>B</sup>  | 55.1±10.8              | 106±33.2 <sup>A</sup>    | 82.3±20.4               | 63.5±10.9 <sup>B</sup>  | 45.2±9.41               | 0.0415  |                     |
| 20cooh-AA*                  | 0.461±0.098             | 0.450±0.121            | 0.765±0.116              | 0.419±0.061             | 0.888±0.248             | 0.412±0.096             |         | 0.0187              |
| 5,6-DiHETrE                 | 87.7±31.8               | 199±41.4               | 75.8±8.77                | 319±64.2                | 46.4±5.81               | 197±42.2                |         | <0.0001             |
| 8,9-DiHETrE                 | 35.2±7.41               | 289±47.9               | 50.6±10.5                | 416±127                 | 30.3±2.66               | 261±41.2                |         | <0.0001             |
| 11,12-DiHETrE               | 115±23.9                | 831±144                | 172±44.8                 | 1053±296                | 102±9.58                | 698±119                 |         | <0.0001             |
| 14,15-DiHETrE               | 101±22.5                | 917±198                | 157±20.6                 | 1170±329                | 96.2±11.6               | 735±145                 |         | <0.0001             |
| 5-iso-PGF <sub>2α</sub> VI  | 37.8±10.1 <sup>B</sup>  | 48.1±5.36              | 53.8±12.3 <sup>A</sup>   | 95.4±15.8               | 31.7±5.80 <sup>B</sup>  | 61.1±15.8               | 0.0205  | 0.0080              |
| 8-iso-PGF <sub>2α</sub> III | 28.2±6.31 <sup>B</sup>  | 34.0±4.04              | 43.5±7.69 <sup>A</sup>   | 59.6±9.41               | 26.0±3.22 <sup>B</sup>  | 43.4±9.64               | 0.0174  | 0.0329              |
| Sum                         | 13901±2846              | 15988±2210             | 16253±2914               | 18382±1630              | 11116±792               | 17343±3183              |         |                     |
| <i>LA oxylipins</i>         |                         |                        |                          |                         |                         |                         |         |                     |
| 9-HODE                      | 3698±1008 <sup>B</sup>  | 5420±1070              | 10408±2804 <sup>A</sup>  | 11221±2733              | 6130±1091 <sup>A</sup>  | 12016±3039              | 0.0013  | 0.0500              |
| 9-oxoODE                    | 89.8±24.2 <sup>B</sup>  | 45.1±6.57              | 202±41.4 <sup>A</sup>    | 339±89.5                | 175±41.4 <sup>A</sup>   | 194±41.4                | <0.0001 |                     |
| 13-HODE                     | 1610±452 <sup>B</sup>   | 2651±647               | 5192±1413 <sup>A</sup>   | 4599±1176               | 2630±457 <sup>A</sup>   | 4989±1245               | 0.0028  |                     |
| 13-oxoODE                   | 101±33.7 <sup>B</sup>   | 83.9±16.4              | 448±114 <sup>A</sup>     | 490±84.9                | 312±86.7 <sup>A</sup>   | 336±25.9                | <0.0001 |                     |
| 9,12,13-TriHOME             | 4570±1086 <sup>B</sup>  | 2017±357               | 12199±4065 <sup>A</sup>  | 12357±4839              | 13450±3873 <sup>A</sup> | 12560±5221              | 0.0005  |                     |
| 9,10-EpOME                  | 28.7±8.68               | 35.8±9.6               | 76.8±26.1                | 48.3±20.1               | 42.4±4.61               | 39.7±7.52               |         |                     |
| 9,10-DiHOME                 | 348±103 <sup>B</sup>    | 931±145                | 1111±372 <sup>A</sup>    | 1767±402                | 755±84.3 <sup>A</sup>   | 1412±159                | 0.0006  | 0.0001              |
| 12,13-EpOME                 | 23±7.1                  | 28.5±7.26              | 41.9±18                  | 42.8±14.2               | 27.2±5.51               | 39.5±5.82               |         |                     |
| 12,13-DiHOME                | 159±37.7 <sup>B</sup>   | 705±145                | 317±45.4 <sup>A</sup>    | 1237±309                | 231±23.9 <sup>A</sup>   | 935±123                 | 0.0077  | <0.0001             |
| Sum                         | 10628±2199 <sup>B</sup> | 11917±1970             | 29995±7348 <sup>A</sup>  | 32095±8676              | 23754±5297 <sup>A</sup> | 32521±9391              | 0.0001  |                     |
| <i>GLA oxylipins</i>        |                         |                        |                          |                         |                         |                         |         |                     |
| 13-HOTrE-γ                  | 77.2±20.3 <sup>b</sup>  | 94.4±16.3 <sup>b</sup> | 263±64.9 <sup>a</sup>    | 121±8.86 <sup>b</sup>   | 87.0±13.6 <sup>ab</sup> | 167±43.4 <sup>b</sup>   |         | 0.0128              |
| <i>EDA oxylipins</i>        |                         |                        |                          |                         |                         |                         |         |                     |
| 15-oxoEDE                   | 1.96±0.569 <sup>B</sup> | 2.51±0.597             | 10.7±2.67 <sup>A</sup>   | 18.9±5.74               | 6.57±1.19 <sup>A</sup>  | 14.3±4.27               | <0.0001 | 0.0338              |
| <i>DGLA oxylipins</i>       |                         |                        |                          |                         |                         |                         |         |                     |
| PGF <sub>1α</sub>           | 16.3±4.89               | 15.4±3.47              | 23.9±2.31                | 9.45±3.09               | 11.4±3.68               | 5.87±3.77               |         | 0.0259              |
| 5-HETrE                     | 41.5±8.83 <sup>A</sup>  | 149±21.8               | 39.6±12.7 <sup>B</sup>   | 77.4±13.1               | 13.6±1.44 <sup>C</sup>  | 45.9±7.49               | <0.0001 | <0.0001             |
| 8-HETrE                     | 36.0±9.29               | 96.1±27.4              | 57.2±9.61                | 62.9±8.83               | 32.2±5.24               | 55.8±14.6               |         | 0.0169              |
| 15-HETrE                    | 647±128                 | 958±243                | 808±233                  | 887±172                 | 607±141                 | 927±285                 |         |                     |
| Sum                         | 741±145                 | 1218±280               | 928±255                  | 1036±175                | 665±145                 | 1035±299                |         |                     |
| <i>AdA oxylipins</i>        |                         |                        |                          |                         |                         |                         |         |                     |
| Dihomo-PGF <sub>2α</sub>    | 24.7±3.97 <sup>B</sup>  | 22.6±4.77              | 101±15 <sup>A</sup>      | 84.7±13.3               | 28.4±2.94 <sup>B</sup>  | 44.5±11.7               | <0.0001 |                     |
| n-6 Sum                     | 25373±4901 <sup>B</sup> | 29242±4211             | 47550±10410 <sup>A</sup> | 51718±9756              | 35656±5625 <sup>A</sup> | 51125±12675             | 0.0082  |                     |

Differing UPPER case superscript letters shown on the female values within a row indicate differences between diets. Differing lower case superscript letters within a row indicate differences between means.

Shading: higher or lower than control; female or male higher in at least one of the diets.

†P values listed across diet and sex are the P value for diet×sex interaction or for Wilcoxin's test P value if the data were not normally distributed.

#Not detected.

\*Denotes no primary standard so not quantified. Values are not included in the sums.

Values are mean±SE (n=5-6 for each), and are based on dry tissue weight.

**Supplemental Table S6b. Liver n-3 Oxylinp in Rats Given Control, LA and LA+ALA Diets for Six Weeks**

| Diet<br>Sex        | Control                |                         | LA                      |                        | LA+ALA                 |                        | Diet                | Sex     |
|--------------------|------------------------|-------------------------|-------------------------|------------------------|------------------------|------------------------|---------------------|---------|
|                    | Female                 | Male                    | Female                  | Male                   | Female                 | Male                   |                     |         |
| <i>ng/g tissue</i> |                        |                         |                         |                        |                        |                        |                     |         |
| <i>ALA oxylinp</i> |                        |                         |                         |                        |                        |                        |                     |         |
| 9-HOTrE            | 408±116 <sup>B</sup>   | 423±97.9                | 1031±378 <sup>AB</sup>  | 809±320                | 974±265 <sup>A</sup>   | 2144±946               | 0.0305              |         |
| 9-OxoOTrE          | 11.7±3.27 <sup>B</sup> | 4.06±0.40               | 21.1±3.72 <sup>A</sup>  | 26.6±6.57              | 28.3±4.69 <sup>A</sup> | 38.1±12.8              | <0.0001             |         |
| 13-HOTrE           | 61.6±16.8 <sup>B</sup> | 68.8±12.5               | 167±41.8 <sup>A</sup>   | 137±45.4               | 159±41.4 <sup>A</sup>  | 354±136                | 0.0002              |         |
| Sum                | 481±134 <sup>B</sup>   | 496±110                 | 1218±419 <sup>AB</sup>  | 973±371                | 1156±297 <sup>A</sup>  | 2536±1090              | 0.0124              |         |
| <i>EPA oxylinp</i> |                        |                         |                         |                        |                        |                        |                     |         |
| PGE <sub>3</sub>   | 19.4±2.76 <sup>A</sup> | 54.8±7.41               | 14.8±1.01 <sup>B</sup>  | 31.1±3.75              | 24.9±5.09 <sup>A</sup> | 73.4±12.3              | 0.0025              | <0.0001 |
| 5-HEPE             | 38.9±9.68              | 98.6±28.1               | 46.5±16.8               | 57.7±6.80              | 51.0±9.11              | 110±15.8               |                     | 0.0004  |
| 8-HEPE             | 12.7±2.91 <sup>b</sup> | 16.4±2.17 <sup>b</sup>  | 16.2±2.56 <sup>b</sup>  | 16.6±2.55 <sup>b</sup> | 16.4±3.00 <sup>b</sup> | 34.5±7.01 <sup>a</sup> | 0.0260 <sup>†</sup> |         |
| 9-HEPE             | 21.8±4.90 <sup>b</sup> | 35.5±7.08 <sup>ba</sup> | 33.9±7.97 <sup>ba</sup> | 21.3±3.38 <sup>b</sup> | 22.8±4.48 <sup>b</sup> | 59.2±17.1 <sup>a</sup> | 0.0146              |         |
| 12-HEPE            | 196±50.6 <sup>AB</sup> | 165±33.2                | 200±87.1 <sup>B</sup>   | 111±27.8               | 248±62.0 <sup>A</sup>  | 403±129                | 0.0235              |         |
| 15-HEPE            | 110±28.5               | 94.9±11.9               | 94.3±34.3               | 81.3±18.8              | 132±46.4               | 278±106                |                     |         |
| 18-HEPE            | 35.5±10.4              | 73.6±22.1               | 38.5±11.7               | 34.5±5.89              | 38.4±4.61              | 96.0±17.0              |                     | 0.0089  |
| RvE <sub>1</sub>   | 6.14±1.09              | 13.3±2.84               | 4.98±1.92               | 11.8±2.35              | 6.53±1.63              | 7.88±1.30              |                     | 0.0009  |
| Sum                | 441±105 <sup>AB</sup>  | 552±106                 | 446±155 <sup>B</sup>    | 365±65                 | 540±127 <sup>A</sup>   | 1062±291               | 0.0258              |         |
| <i>DHA oxylinp</i> |                        |                         |                         |                        |                        |                        |                     |         |
| 4-HDoHE            | 668±171 <sup>A</sup>   | 1005±255                | 475±109 <sup>B</sup>    | 363±104                | 421±71.8 <sup>B</sup>  | 503±123                | 0.0179              |         |
| 7-HDoHE            | 184±60.6               | 150±11.6                | 226±74.1                | 179±59.6               | 133±17.2               | 180±37.5               |                     |         |
| 8-HDoHE            | 270±82.8               | 271±31.6                | 273±76.0                | 235±42.1               | 188±18.5               | 264±46.2               |                     |         |
| 10-HDoHE           | 136±35.1               | 130±13.4                | 187±39.8                | 106±18.9               | 142±42.1               | 136±26.0               |                     |         |
| 11-HDoHE           | 271±74.5               | 326±47.3                | 290±79.2                | 215±40.8               | 206±46.0               | 247±49.2               |                     |         |
| 13-HDoHE           | 754±175                | 520±89.3                | 697±169                 | 319±70.6               | 605±68.8               | 477±93.9               |                     | 0.0066  |
| 14-HDoHE           | 1327±407               | 879±141                 | 728±119                 | 593±126                | 912±89.4               | 977±198                |                     |         |
| 16-HDoHE           | 249±68.1               | 219±30.4                | 296±91.0                | 175±34.7               | 283±49.9               | 290±42.1               |                     |         |
| 17-HDoHE           | 944±259                | 963±119                 | 1349±355                | 786±165                | 1189±170               | 1431±260               |                     |         |
| 20-HDoHE           | 928±291                | 1198±211                | 1000±346                | 865±128                | 796±72.9               | 1119±189               |                     |         |
| 19,20-EpDPE        | 18.2±4.88              | 21.8±4.76               | 13.8±5.38               | 10.2±1.91              | 9.63±1.61              | 13.7±2.96              |                     |         |
| 19,20-DiHDoPE      | 110±25.1               | 346±50.8                | 87.3±9.23               | 220±26.6               | 91.4±10.6              | 263±46.8               |                     | <0.0001 |
| Sum                | 5859±1534              | 6027±936                | 5501±1186               | 4066±711               | 4976±444               | 5900±827               |                     |         |
| Sum n-3            | 6781±1732              | 7075±1106               | 7165±1510               | 5403±1098              | 6673±592               | 9498±1902              |                     |         |

Differing UPPER case superscript letters shown on the female values within a row indicate differences between diets. Differing lower case superscript letters within a row indicate differences between means.

Shading: higher or lower than control; female or male higher in at least one of the diets.

†P values listed across diet and sex are the P value for diet×sex interaction or for Wilcoxin's test P value if the data were not normally distributed.

Values are mean±SE (n=5-6 for each), and are based on dry tissue weight.

**Supplemental Table S7a.** Serum n-6 Oxylipins in Rats Given Control, LA and LA+ALA Diets for Six Weeks

| Diet Sex                          | Control                  |                          | LA                       |                           | LA+ALA                    |                           | Diet    | Sex    |
|-----------------------------------|--------------------------|--------------------------|--------------------------|---------------------------|---------------------------|---------------------------|---------|--------|
|                                   | Female                   | Male                     | Female                   | Male                      | Female                    | Male                      |         |        |
| <i>AA oxylipins</i>               |                          |                          |                          |                           |                           |                           |         |        |
| <b>PGD<sub>2</sub></b>            | 2.18±0.59                | 3.34±0.80                | 2.48±0.74                | 3.13±1.02                 | 1.42±0.28                 | 2.67±0.73                 |         |        |
| <b>PGJ<sub>2</sub></b>            | 0.63±0.16                | 2.85±1.25                | 0.59±0.17                | 1.57±0.63                 | 0.36±0.13                 | 1.62±0.43                 |         | 0.0005 |
| <b>15d-PGJ<sub>2</sub></b>        | 0.25±0.05                | 0.29±0.06                | 0.20±0.07                | 0.29±0.11                 | 0.10±0.01                 | 0.26±0.07                 |         |        |
| <b>PGE<sub>2</sub></b>            | 3.64±0.96                | 5.01±1.10                | 4.11±1.25                | 5.48±1.88                 | 2.79±0.57                 | 4.87±1.29                 |         |        |
| <b>15k-PGE<sub>2</sub></b>        | 0.023±0.007              | 0.082±0.032              | 0.019±0.004              | 0.059±0.020               | 0.028±0.013               | 0.086±0.040               |         | 0.0116 |
| <b>PGF<sub>2α</sub></b>           | 1.19±0.29                | 1.92±0.34                | 1.41±0.32                | 2.12±0.55                 | 0.97±0.14                 | 2.12±0.47                 |         | 0.0075 |
| <b>6k-PGF<sub>1α</sub></b>        | 0.086±0.024              | 0.108±0.015              | 0.050±0.006              | 0.098±0.025               | 0.057±0.015               | 0.084±0.014               |         | 0.0044 |
| <b>TXB<sub>2</sub></b>            | 29.7±9.90                | 48.9±7.73                | 30.2±7.46                | 41.6±11.1                 | 21.2±3.38                 | 44.6±11.3                 |         | 0.0195 |
| <b>5-HETE</b>                     | 2.09±0.169               | 3.62±0.651               | 2.43±0.299               | 4.03±0.649                | 2.11±0.219                | 3.91±0.795                |         | 0.0001 |
| <b>5,15-DiHETE</b>                | 0.024±0.004              | 0.036±0.008              | 0.021±0.005              | 0.043±0.007               | 0.031±0.005               | 0.064±0.020               |         | 0.0054 |
| <b>5-oxoETE</b>                   | 0.83±0.08                | 1.07±0.22                | 1.36±0.28                | 1.68±0.41                 | 0.89±0.13                 | 1.68±0.54                 |         |        |
| <b>8-HETE</b>                     | 0.504±0.091              | 0.709±0.094              | 0.618±0.090              | 0.681±0.095               | 0.430±0.081               | 0.665±0.154               |         |        |
| <b>9-HETE</b>                     | 1.19±0.15                | 1.70±0.29                | 1.39±0.21                | 1.73±0.25                 | 1.14±0.18                 | 1.71±0.53                 |         |        |
| <b>11-HETE</b>                    | 8.07±2.18                | 15.5±3.61                | 8.27±1.67                | 9.71±2.14                 | 5.54±0.99                 | 11.4±3.06                 |         | 0.0182 |
| <b>12-HETE</b>                    | 121±30.9                 | 175±29.0                 | 139±25.5                 | 146±24.1                  | 103±15.8                  | 153±34.7                  |         |        |
| <b>tetranor-12-HETE</b>           | 0.141±0.038              | 0.128±0.020              | 0.179±0.045              | 0.165±0.023               | 0.125±0.020               | 0.188±0.026               |         |        |
| <b>12-oxoETE</b>                  | 1.80±0.62                | 0.90±0.13                | 1.34±0.16                | 1.61±0.42                 | 0.84±0.04                 | 1.78±0.38                 |         |        |
| <b>HXB<sub>3</sub></b>            | 0.69±0.16                | 1.09±0.18                | 0.98±0.16                | 1.09±0.17                 | 0.87±0.11                 | 1.10±0.25                 |         |        |
| <b>15-HETE</b>                    | 7.77±1.80                | 15.3±3.55                | 8.08±1.62                | 11.1±2.29                 | 6.40±1.04                 | 12.0±2.89                 |         | 0.0055 |
| <b>15-oxoETE</b>                  | 0.70±0.26                | 0.66±0.12                | 0.68±0.11                | 0.95±0.24                 | 0.47±0.059                | 1.05±0.31                 |         |        |
| <b>6t -12-epi-LTB<sub>4</sub></b> | 0.226±0.035              | 0.570±0.130              | 0.238±0.046              | 0.481±0.144               | 0.205±0.035               | 0.379±0.074               |         | 0.0002 |
| <b>5-iso-PGF<sub>2α</sub>VI</b>   | -# <sup>b</sup>          | 0.104±0.007 <sup>a</sup> | - <sup>b</sup>           | 0.089±0.038 <sup>ab</sup> | 0.068±0.068 <sup>ab</sup> | 0.131±0.0134 <sup>a</sup> |         | 0.0011 |
| <b>Sum</b>                        | 184±47.4                 | 271±36.3                 | 205±37.4                 | 236±44.1                  | 151±22.7                  | 248±56.3                  |         | 0.0451 |
| <i>LA oxylipins</i>               |                          |                          |                          |                           |                           |                           |         |        |
| <b>9-HODE</b>                     | 10.9±1.48                | 16.3±1.44                | 18.1±2.60                | 22.7±3.53                 | 14.2±4.55                 | 18.7±4.73                 |         | 0.0288 |
| <b>9-oxoODE</b>                   | 0.368±0.095 <sup>b</sup> | 0.287±0.057              | 0.945±0.127 <sup>A</sup> | 0.879±0.196               | 0.586±0.208 <sup>A</sup>  | 0.932±0.323               | 0.0006  |        |
| <b>13-HODE</b>                    | 6.67±0.95                | 11.0±1.33                | 12.0±1.65                | 14.8±1.95                 | 7.22±0.96                 | 14.4±3.53                 |         |        |
| <b>13-oxoODE</b>                  | 2.77±0.38 <sup>B</sup>   | 2.19±0.34                | 6.74±0.75 <sup>A</sup>   | 6.18±1.20                 | 3.67±0.72 <sup>A</sup>    | 5.79±1.65                 | 0.0001  |        |
| <b>9,12,13-TriHOME</b>            | 3.02±0.52 <sup>B</sup>   | 4.42±0.74                | 5.51±1.19 <sup>A</sup>   | 7.44±1.46                 | 5.45±1.69 <sup>A</sup>    | 8.67±2.61                 | 0.0303  | 0.0323 |
| <b>9,10-EpOME</b>                 | 0.098±0.027              | 0.101±0.028              | 0.227±0.053              | 0.220±0.074               | 0.181±0.074               | 0.123±0.067               |         |        |
| <b>9,10-DiHOME</b>                | 1.63±0.30 <sup>B</sup>   | 1.58±0.26                | 5.51±0.54 <sup>A</sup>   | 5.76±0.28                 | 1.77±0.24 <sup>B</sup>    | 1.70±0.18                 | <0.0001 |        |
| <b>12,13-EpOME</b>                | 0.351±0.064 <sup>B</sup> | 0.348±0.068              | 0.614±0.089 <sup>A</sup> | 0.527±0.073               | 0.456±0.097 <sup>AB</sup> | 0.446±0.168               | 0.0489  |        |
| <b>12,13-DiHOME</b>               | 1.24±0.23 <sup>B</sup>   | 1.61±0.39                | 2.57±0.22 <sup>A</sup>   | 2.35±0.098                | 1.55±0.34 <sup>B</sup>    | 1.47±0.22                 | 0.0012  |        |
| <b>Sum</b>                        | 27.0±3.41 <sup>B</sup>   | 37.7±4.11                | 52.2±6.16 <sup>A</sup>   | 60.8±8.00                 | 33.9±6.85 <sup>B</sup>    | 52.2±13.2                 | 0.0045  | 0.0273 |
| <i>GLA oxylipins</i>              |                          |                          |                          |                           |                           |                           |         |        |
| <b>13-HOTrE-γ</b>                 | 0.293±0.069              | 0.304±0.077              | 0.437±0.106              | 0.509±0.092               | 0.320±0.106               | 0.365±0.070               |         |        |
| <i>DGLA oxylipins</i>             |                          |                          |                          |                           |                           |                           |         |        |
| <b>PGD<sub>1</sub></b>            | 0.174±0.062              | 0.344±0.083              | 0.149±0.021              | 0.294±0.067               | 0.125±0.035               | 0.227±0.066               |         | 0.0301 |
| <b>PGF<sub>1α</sub></b>           | 0.049±0.023              | 0.102±0.032              | 0.024±0.024              | 0.078±0.031               | 0.037±0.018               | 0.055±0.025               |         |        |
| <b>8-HETrE</b>                    | 0.039±0.004              | 0.0934±0.017             | 0.077±0.010              | 0.096±0.017               | 0.070±0.017               | 0.096±0.017               |         | 0.0031 |
| <b>15-HETrE</b>                   | 0.38±0.06                | 1.04±0.17                | 0.45±0.09                | 0.63±0.15                 | 0.38±0.07                 | 0.67±0.13                 |         | 0.0004 |
| <b>Sum</b>                        | 0.64±0.13                | 1.58±0.27                | 0.70±0.13                | 1.10±0.25                 | 0.61±0.11                 | 1.05±0.22                 |         | 0.0008 |
| <b>n-6 Sum</b>                    | 212±47.3                 | 311±39.4                 | 258±43.1                 | 299±50                    | 186±28.3                  | 302±65.8                  |         | 0.0349 |

Differing UPPER case superscript letters shown on the female values within a row indicate differences between diets. Differing lower case superscript letters within a row indicate differences between means.

Shading: higher or lower than control; female or male higher in at least one of the diets.

†P values listed across diet and sex are the P value for diet×sex interaction or for Wilcoxin's test P value if the data were not normally distributed.

#Not detected.

Values are mean±SE (n=5-6 for each), and are based on dry tissue weight.

**Supplemental Table 7b.** Serum n-3 Oxylipins in Rats Given Control, LA and LA+ALA Diets for Six Weeks

| Diet<br>Sex             | Control                   |               | LA                        |               | LA+ALA                     |               | Diet    | Sex     |
|-------------------------|---------------------------|---------------|---------------------------|---------------|----------------------------|---------------|---------|---------|
|                         | Female                    | Male          | Female                    | Male          | Female                     | Male          |         |         |
| <i>ng/ml</i>            |                           |               |                           |               |                            |               |         |         |
| <i>ALA oxylipins</i>    |                           |               |                           |               |                            |               |         |         |
| <b>9-HOTrE</b>          | 0.53±0.10 <sup>B</sup>    | 0.83±0.13     | 0.60±0.11 <sup>B</sup>    | 0.73±0.13     | 1.42±0.58 <sup>A</sup>     | 1.50±0.40     | 0.0084  |         |
| <b>9-oxoOTrE</b>        | 0.121±0.014 <sup>B</sup>  | 0.097±0.021   | 0.131±0.020 <sup>B</sup>  | 0.144±0.035   | 0.204±0.061 <sup>A</sup>   | 0.279±0.087   | 0.0228  |         |
| <b>13-HOTrE</b>         | 0.95±0.21 <sup>AB</sup>   | 1.27±0.22     | 0.83±0.17 <sup>B</sup>    | 0.95±0.15     | 1.82±0.56 <sup>A</sup>     | 2.29±0.69     | 0.0095  |         |
| <b>12,13-DiHODE</b>     | 0.123±0.026               | 0.105±0.026   | 0.140±0.021               | 0.089±0.007   | 0.163±0.023                | 0.117±0.022   |         | 0.0435  |
| <b>Sum</b>              | 1.72±0.32 <sup>B</sup>    | 2.30±0.38     | 1.70±0.27 <sup>B</sup>    | 1.92±0.29     | 3.61±1.21 <sup>A</sup>     | 4.18±1.16     | 0.0097  |         |
| <i>EPA oxylipins</i>    |                           |               |                           |               |                            |               |         |         |
| <b>PGF<sub>3α</sub></b> | 0.212±0.062 <sup>AB</sup> | 0.041±0.011   | 0.274±0.072 <sup>A</sup>  | 0.090±0.039   | 0.130±0.034 <sup>B</sup>   | 0.028±0.008   | 0.0088  | <0.0001 |
| <b>TXB<sub>3</sub></b>  | 0.043±0.009               | 0.104±0.022   | 0.034±0.005               | 0.046±0.007   | 0.038±0.012                | 0.086±0.018   |         | 0.0001  |
| <b>5-HEPE</b>           | 0.058±0.010               | 0.141±0.021   | 0.066±0.010               | 0.095±0.012   | 0.090±0.014                | 0.146±0.023   |         | 0.0002  |
| <b>8-HEPE</b>           | 0.0301±0.005 <sup>A</sup> | 0.0402±0.006  | 0.0280±0.006 <sup>B</sup> | 0.0211±0.003  | 0.0472±0.0107 <sup>A</sup> | 0.0505±0.007  | 0.0022  |         |
| <b>12-HEPE</b>          | 1.93±0.40 <sup>AB</sup>   | 5.04±1.20     | 2.19±0.58 <sup>B</sup>    | 2.12±0.38     | 3.62±0.67 <sup>A</sup>     | 5.36±1.09     | 0.0266  | 0.0220  |
| <b>15-HEPE</b>          | 0.061±0.007 <sup>A</sup>  | 0.155±0.025   | 0.040±0.006 <sup>B</sup>  | 0.068±0.009   | 0.079±0.012 <sup>A</sup>   | 0.182±0.040   | <0.0001 | <0.0001 |
| <b>18-HEPE</b>          | 0.061±0.010 <sup>A</sup>  | 0.118±0.024   | 0.048±0.013 <sup>B</sup>  | 0.066±0.010   | 0.099±0.025 <sup>A</sup>   | 0.188±0.045   | 0.0027  | 0.0039  |
| <b>Sum</b>              | 2.40±0.46 <sup>AB</sup>   | 5.64±1.25     | 2.68±0.60 <sup>B</sup>    | 2.51±0.38     | 4.10±0.74 <sup>A</sup>     | 6.04±1.19     | 0.0282  | 0.0250  |
| <i>DHA oxylipins</i>    |                           |               |                           |               |                            |               |         |         |
| <b>4-HDoHE</b>          | 1.02±0.16                 | 1.07±0.15     | 0.75±0.16                 | 0.76±0.13     | 1.05±0.16                  | 1.12±0.20     |         |         |
| <b>7-HDoHE</b>          | 0.203±0.016               | 0.156±0.024   | 0.153±0.027               | 0.143±0.020   | 0.205±0.031                | 0.177±0.037   |         |         |
| <b>8-HDoHE</b>          | 0.253±0.035               | 0.243±0.052   | 0.168±0.031               | 0.162±0.026   | 0.247±0.040                | 0.254±0.039   |         |         |
| <b>10-HDoHE</b>         | 0.246±0.027               | 0.247±0.025   | 0.206±0.040               | 0.176±0.031   | 0.221±0.032                | 0.243±0.061   |         |         |
| <b>11-HDoHE</b>         | 0.104±0.013               | 0.131±0.021   | 0.0742±0.019              | 0.110±0.020   | 0.101±0.020                | 0.146±0.038   |         |         |
| <b>13-HDoHE</b>         | 0.456±0.037               | 0.511±0.052   | 0.337±0.060               | 0.371±0.068   | 0.426±0.062                | 0.511±0.105   |         |         |
| <b>14-HDoHE</b>         | 4.05±0.68                 | 5.10±0.86     | 3.61±0.70                 | 3.44±0.68     | 3.68±0.55                  | 4.70±1.40     |         |         |
| <b>16-HDoHE</b>         | 0.284±0.023               | 0.303±0.036   | 0.230±0.045               | 0.249±0.043   | 0.316±0.046                | 0.302±0.059   |         |         |
| <b>17-HDoHE</b>         | 3.32±0.20 <sup>AB</sup>   | 4.93±0.72     | 3.14±0.37 <sup>B</sup>    | 4.03±0.54     | 5.25±0.63 <sup>A</sup>     | 5.54±1.21     | 0.0424  |         |
| <b>20-HDoHE</b>         | 0.488±0.060               | 0.573±0.117   | 0.498±0.121               | 0.602±0.118   | 0.662±0.095                | 0.697±0.188   |         |         |
| <b>16,17-EpDPE</b>      | 0.088±0.0214              | 0.152±0.023   | 0.057±0.036               | 0.113±0.051   | 0.085±0.042                | 0.112±0.060   |         |         |
| <b>19,20-EpDPE</b>      | 0.0849±0.0103             | 0.0849±0.0095 | 0.0845±0.0181             | 0.0774±0.0066 | 0.0884±0.0182              | 0.0731±0.0106 |         |         |
| <b>19,20-DiHDoPE</b>    | 0.520±0.069               | 0.468±0.073   | 0.349±0.066               | 0.390±0.059   | 0.442±0.036                | 0.637±0.103   |         |         |
| <b>Sum</b>              | 11.1±0.69                 | 14.0±1.68     | 9.66±1.24                 | 10.6±1.54     | 12.8±0.77                  | 14.5±3.18     |         |         |
| <b>Sum n-3</b>          | 15.2±1.01 <sup>AB</sup>   | 21.9±2.90     | 14.0±1.87 <sup>B</sup>    | 15.1±2.00     | 20.5±2.34 <sup>A</sup>     | 24.7±5.25     | 0.0181  |         |

Differing UPPER case superscript letters shown on the female values within a row indicate differences between diets. Differing lower case superscript letters within a row indicate differences between means. Shading: higher or lower than control; female or male higher in at least one of the diets. Values are mean±SE (n=5-6 for each), and are based on dry tissue weight.

**Supplemental Table S8.** Kidney phospholipid fatty acids in rats given control, LA and LA+ALA diets for six weeks

| Diet               | Adequate LA             |                        | High LA                 |                         | High LA+ALA             |                            | Diet                | Sex     |
|--------------------|-------------------------|------------------------|-------------------------|-------------------------|-------------------------|----------------------------|---------------------|---------|
|                    | Female                  | Male                   | Female                  | Male                    | Female                  | Male                       |                     |         |
|                    | <b>µg/g tissue</b>      |                        |                         |                         |                         |                            |                     |         |
| <b>14:0</b>        | 104±8.91 <sup>B</sup>   | 136±13.6               | 151±10.9 <sup>A</sup>   | 163±25.1                | 79±4.96 <sup>B</sup>    | 122±14.7                   | 0.0024              | 0.0245  |
| <b>16:0</b>        | 18378±1377 <sup>A</sup> | 15823±804              | 14683±853 <sup>B</sup>  | 14126±704               | 15643±862 <sup>AB</sup> | 16548±533                  | 0.0202              |         |
| <b>16:1</b>        | 527±104                 | 618±125                | 425±53.0                | 438±88.5                | 598±74.2                | 520±65.6                   |                     |         |
| <b>17:0</b>        | 140±23.3                | 224±103                | 197±31.5                | 340±134                 | 210±29.7                | 195±20.1                   |                     |         |
| <b>18:0</b>        | 16288±1205              | 15098±1269             | 13203±928               | 14132±877               | 13543±1134              | 15856±1044                 |                     |         |
| <b>18:1</b>        | 10034±249 <sup>A</sup>  | 6891±689               | 5095±363 <sup>B</sup>   | 3930±166                | 5034±333 <sup>B</sup>   | 4478±225                   | <0.0001             | <0.0001 |
| <b>18:2n6</b>      | 7803±501 <sup>B</sup>   | 8268±638               | 8597±527 <sup>B</sup>   | 9100±538                | 9996±745 <sup>A</sup>   | 11798±535                  | 0.0002              |         |
| <b>18:3n3</b>      | 99.2±8.8 <sup>B</sup>   | 63.6±12.1              | 89.4±9.28 <sup>B</sup>  | 60.4±10.5               | 171±16.1 <sup>A</sup>   | 152±11.6                   | <0.0001             | 0.0078  |
| <b>18:3n6</b>      | 62.7±4.69 <sup>ab</sup> | 41.5±10.0 <sup>b</sup> | 79.9±6.50 <sup>a</sup>  | 62.8±16.6 <sup>ab</sup> | 64.3±10.4 <sup>ab</sup> | 90.0±8.38 <sup>a</sup>     | 0.0467 <sup>†</sup> |         |
| <b>20:0</b>        | 345±27.9 <sup>a</sup>   | 210±10.8 <sup>c</sup>  | 270±18.1 <sup>b</sup>   | 200±14 <sup>c</sup>     | 256±26.1 <sup>cb</sup>  | 228.67±15.46 <sup>cb</sup> | 0.0348              |         |
| <b>20:1</b>        | 193±15.3 <sup>a</sup>   | 138±10.3 <sup>b</sup>  | 88.5±9.48 <sup>c</sup>  | 90.4±9.56 <sup>c</sup>  | 93.6±19.8 <sup>c</sup>  | 100±6.15 <sup>c</sup>      | 0.0385              |         |
| <b>20:2n6</b>      | 180±9.81 <sup>B</sup>   | 146±12.4               | 333±20.5 <sup>A</sup>   | 283±22.0                | 300±35.5 <sup>A</sup>   | 320±31.8                   | <0.0001             |         |
| <b>20:3n3</b>      | 65.9±22.9               | 72±15.3                | 96.4±6.46               | 71.4±10.4               | 92.6±21.8               | 119±16.9                   |                     |         |
| <b>20:3n6</b>      | 694±59.6                | 1057±102               | 614±54.2                | 789±67.1                | 690±79.2                | 865±61.4                   |                     | 0.0005  |
| <b>20:4n6</b>      | 27022±2088              | 25223±2181             | 20579±1504              | 23170±1455              | 20700±1559              | 26161±1290                 |                     |         |
| <b>20:5n3</b>      | 229±23.7 <sup>A</sup>   | 173±20.1               | 88.7±8.08 <sup>B</sup>  | 75.2±4.75               | 245±19.3 <sup>A</sup>   | 168±4.30                   | <0.0001             | 0.0022  |
| <b>22:0</b>        | 840±89.4                | 465±24.8               | 659±59.7                | 465±29.4                | 692±48.7                | 531±28.6                   | 0.2352              | <0.0001 |
| <b>22:1</b>        | 55.7±10.8               | 28.8±4.38              | 12.9±6.14               | 23.4±11.9               | 24.6±6.31               | 29.4±9.55                  |                     |         |
| <b>22:2n6</b>      | 93.3±42.2               | 111±40.6               | 107±44.0                | 167±41.2                | 149±35.3                | 129±39.2                   |                     |         |
| <b>22:4n6</b>      | 637±51.2                | 550±45.4               | 655±50.3                | 625±34.6                | 506±44.4                | 610±22.4                   |                     |         |
| <b>22:5n3</b>      | 242±26.8 <sup>AB</sup>  | 209±21.0               | 212±35.7 <sup>B</sup>   | 167±13.9                | 258±35.6 <sup>A</sup>   | 282±33.0                   | 0.0303              |         |
| <b>22:5n6</b>      | 302±45.5 <sup>B</sup>   | 259±46.9               | 402±34.6 <sup>A</sup>   | 390±39.0                | 103±21.8 <sup>C</sup>   | 125±14.2                   | <0.0001             |         |
| <b>22:6n3</b>      | 3800±352 <sup>A</sup>   | 1777±188               | 2156±218 <sup>B</sup>   | 1279±61.6               | 2774±211 <sup>A</sup>   | 1712±122                   | 0.0001              | <0.0001 |
| <b>24:0</b>        | 3979±462                | 3253±224               | 3427±381                | 3396±257                | 3698±295                | 3728±208                   |                     |         |
| <b>24:1</b>        | 1655±117 <sup>A</sup>   | 1421±79.0              | 800±34.9 <sup>B</sup>   | 829±69.9                | 921±58.9 <sup>B</sup>   | 981±50.6                   | <0.0001             |         |
| <b>n6/n3 ratio</b> | 8.59±0.246 <sup>C</sup> | 16.2±0.545             | 12.7±0.897 <sup>A</sup> | 22±0.745                | 9.73±0.493 <sup>B</sup> | 16.9±0.293                 | <0.0001             | <0.0001 |

†P values listed across diet and sex effects are the P value for a diet x sex interaction when there was a significant interaction or the P value for the Wilcoxin test if the data were not normally distributed.

Differing UPPER case superscript letters shown on the female values within a row indicated differences between diets. Differing lower case superscript letters within a row indicate differences between means.

Values are mean±SE (n=5-6).

**Supplemental Table S9.** Liver phospholipid fatty acids in rats given control, LA and LA+ALA diets for six weeks

| Diet               | Adequate LA             |                         | High LA                  |                         | High LA+ALA             |                         | Diet                | Sex     |
|--------------------|-------------------------|-------------------------|--------------------------|-------------------------|-------------------------|-------------------------|---------------------|---------|
|                    | Female                  | Male                    | Female                   | Male                    | Female                  | Male                    |                     |         |
|                    | <b>µg/g tissue</b>      |                         |                          |                         |                         |                         |                     |         |
| <b>14:0</b>        | 68.4±16.8               | 134±9.53                | 98.2±10.3                | 164±29.8                | 61.5±2.76               | 141±15.2                |                     | <0.0001 |
| <b>16:0</b>        | 7698±527                | 9709±625                | 8131±514                 | 11129±726               | 7954±257                | 10863±479               |                     | <0.0001 |
| <b>16:1</b>        | 310±30.9 <sup>b</sup>   | 466±101 <sup>a</sup>    | 180±14.1 <sup>b</sup>    | 576±45.9 <sup>a</sup>   | 207±24.4 <sup>b</sup>   | 572±30.2 <sup>a</sup>   | 0.0469 <sup>†</sup> |         |
| <b>17:0</b>        | 113±22.2 <sup>B</sup>   | 69.7±13.2               | 187±17.2 <sup>A</sup>    | 108±18.2                | 1234±11.4 <sup>AB</sup> | 110±13.7                | 0.0074              | 0.0019  |
| <b>18:0</b>        | 20612±4601              | 15148±1707              | 24802±1828               | 14828±1187              | 24143±1661              | 11795±1037              |                     | <0.0001 |
| <b>18:1</b>        | 1928±57.5 <sup>A</sup>  | 2678±181                | 1233±94.5 <sup>B</sup>   | 1794±127                | 1185±77.6 <sup>B</sup>  | 1788±81.8               | <0.0001             | <0.0001 |
| <b>18:2n6</b>      | 4435±411 <sup>B</sup>   | 5147±549                | 6930±511 <sup>A</sup>    | 7650±799                | 6701±406 <sup>A</sup>   | 7643±580                | <0.0001             | 0.093   |
| <b>18:3n3</b>      | 45.9±20.4               | 48.3±18.1               | 46.7±17.6                | 66.5±15.9               | 74.1±15.1               | 105±19.7                |                     |         |
| <b>18:3n6</b>      | 39±9.39                 | 129±21.6                | 87.1±30.4                | 183±27.8                | 66.4±11                 | 158±15.1                |                     | <.0001  |
| <b>20:0</b>        | 71.3±7.94 <sup>B</sup>  | 62.1±7.61               | 95.8±4.86 <sup>A</sup>   | 88.6±15.4               | 75.9±7.96 <sup>AB</sup> | 70.5±9.3                | 0.0454              |         |
| <b>20:1</b>        | 90.6±10.4               | 111±8.1                 | 82±4.14                  | 110±16.5                | 71.5±7.97               | 132±15.6                |                     | 0.0006  |
| <b>20:2n6</b>      | 166±29.1 <sup>B</sup>   | 155±12.2                | 438±30 <sup>A</sup>      | 469±77.4                | 316±15.4 <sup>A</sup>   | 439±59.4                | <0.0001             |         |
| <b>20:3n3</b>      | 50.3±18 <sup>B</sup>    | 18.3±7.73               | 24.8±1.29 <sup>B</sup>   | 26.8±4.97               | 62.7±6.97 <sup>A</sup>  | 69.2±12.2               | 0.0002              |         |
| <b>20:3n6</b>      | 651±44.1                | 1501±207                | 690±175                  | 1279±112                | 869±140                 | 1588±122                |                     | <0.0001 |
| <b>20:4n6</b>      | 18705±726 <sup>B</sup>  | 15177±635               | 22598±1918 <sup>A</sup>  | 20745±1695              | 18717±971 <sup>B</sup>  | 16745±1115              | 0.0019              | 0.0136  |
| <b>20:5n3</b>      | 251±65.5 <sup>A</sup>   | 190±39                  | 61.9±7.96 <sup>B</sup>   | 94.1±30.1               | 273±36.1 <sup>A</sup>   | 214±22.6                | <0.0001             |         |
| <b>22:0</b>        | 351±57.9                | 290±39.9                | 363±52.7                 | 284±49.2                | 360±27.7                | 318±43.6                |                     |         |
| <b>22:1</b>        | 34.9±19.8               | 205±84                  | 67.6±58.6                | 140±76.8                | 33.2±19.8               | 196±46.9                |                     | 0.0068  |
| <b>22:2n6</b>      | 326±198                 | 246±120                 | 406±246                  | 31.4±17.1               | 465±195                 | 51.6±39.4               |                     | 0.0348  |
| <b>22:4n6</b>      | 300±55.7 <sup>bc</sup>  | 260±18 <sup>bc</sup>    | 446±90.2 <sup>ab</sup>   | 545±93.7 <sup>a</sup>   | 240±36.4 <sup>c</sup>   | 351±58.6 <sup>bc</sup>  | 0.0087              |         |
| <b>22:5n3</b>      | 198±33 <sup>B</sup>     | 364±51.5                | 320.2±62.7 <sup>AB</sup> | 423±72.7                | 386±55.1 <sup>A</sup>   | 608±79.3                | 0.003               | 0.001   |
| <b>22:5n6</b>      | 871±136 <sup>B</sup>    | 799±69.5                | 938±90 <sup>A</sup>      | 1547±200                | 502±35.3 <sup>C</sup>   | 488±101                 | <0.0001             |         |
| <b>22:6n3</b>      | 8199±938                | 4638±257                | 7296±746                 | 3986±377                | 7683±555                | 4377±428                |                     | <0.0001 |
| <b>24:0</b>        | 808±100                 | 411±19.9                | 872±60.2                 | 537±55.4                | 791±48.9                | 475±36.4                |                     | <0.0001 |
| <b>24:1</b>        | 521±63.9 <sup>A</sup>   | 259±14.4                | 341±31.2 <sup>B</sup>    | 227±18.5                | 277±32.2 <sup>C</sup>   | 164±10.1                | <0.0001             | <0.0001 |
| <b>n6/n3 ratio</b> | 3.28±0.072 <sup>d</sup> | 4.55±0.08 <sup>bc</sup> | 4.32±0.264 <sup>c</sup>  | 6.82±0.532 <sup>a</sup> | 3.34±0.093 <sup>d</sup> | 5.31±0.252 <sup>b</sup> | <0.0001             |         |

<sup>†</sup>P values listed across diet and sex effects are the P value for a diet x sex interaction when there was a significant interaction or the P value for the Wilcoxin test if the data were not normally distributed.

Differing UPPER case superscript letters shown on the female values within a row indicated differences between diets. Differing lower case superscript letters within a row indicate differences between means.

Values are mean±SE (n=5-6).

**Supplemental Table S10.** Serum total fatty acids in rats given control, LA and LA+ALA diets for six weeks

| Diet               | Adequate LA             |                          | High LA                 |                         | High LA+ALA              |                         | Diet               | Sex     |
|--------------------|-------------------------|--------------------------|-------------------------|-------------------------|--------------------------|-------------------------|--------------------|---------|
|                    | Female                  | Male                     | Female                  | Male                    | Female                   | Male                    |                    |         |
|                    |                         |                          | µg/mL                   |                         |                          |                         |                    |         |
| <b>14:0</b>        | 26.8±1.94 <sup>A</sup>  | 32.5±7.19                | 25±6.84 <sup>A</sup>    | 39.2±7.11               | 10.9±1.91 <sup>B</sup>   | 19.9±4.66               | 0.009              |         |
| <b>16:0</b>        | 826±107 <sup>A</sup>    | 753±59.3                 | 419±92.7 <sup>B</sup>   | 561±87.2                | 677±70.4 <sup>AB</sup>   | 586±94.5                | 0.0073             |         |
| <b>16:1</b>        | 78.3±12.5 <sup>ba</sup> | 103±17.4 <sup>a</sup>    | 16.8±3.28 <sup>d</sup>  | 54.9±8.65 <sup>bc</sup> | 34.8±4.64 <sup>c</sup>   | 67.7±13.9 <sup>ba</sup> | 0.045 <sup>†</sup> |         |
| <b>17:0</b>        | 5.37±1.15               | 3.22±0.940               | 4.23±1.35               | 1.81±0.120              | 4.08±0.97                | 3.27±0.630              |                    |         |
| <b>18:0</b>        | 640±77.1 <sup>A</sup>   | 345±39.7                 | 377±51.7 <sup>B</sup>   | 313±61.2                | 665±44.3 <sup>A</sup>    | 305±59.9                | 0.0335             | <0.0001 |
| <b>18:1</b>        | 1293±192 <sup>A</sup>   | 976±146                  | 295±68.6 <sup>C</sup>   | 365±66.5                | 606±58.9 <sup>B</sup>    | 477±65.7                | <0.0001            |         |
| <b>18:2n6</b>      | 548±54.6 <sup>B</sup>   | 645±45.5                 | 750±158 <sup>AB</sup>   | 842±106                 | 1036±101 <sup>A</sup>    | 839±135                 | 0.0178             |         |
| <b>18:3n3</b>      | 27.1±3.2 <sup>B</sup>   | 38.7±5.12                | 23.1±5.78 <sup>B</sup>  | 25.3±4.11               | 68.7±10.7 <sup>A</sup>   | 62.8±12.0               | 0.0001             |         |
| <b>18:3n6</b>      | 8.42±1.24               | 7.57±1.01                | 7.26±0.630              | 5.69±1.05               | 9.52±0.73                | 5.46±0.950              |                    | 0.0108  |
| <b>20:0</b>        | 4.85±0.33               | 5.86±0.510               | 4.27±0.860              | 4.26±0.58               | 5.37±0.49                | 4.94±0.760              |                    |         |
| <b>20:1</b>        | 7.58±1.27 <sup>A</sup>  | 9.37±1.57                | 1.69±0.640 <sup>C</sup> | 3.72±0.900              | 4.23±0.46 <sup>B</sup>   | 4.61±1.08               | <0.0001            |         |
| <b>20:2n6</b>      | 4.09±0.260 <sup>c</sup> | 7.54±0.440 <sup>bc</sup> | 9.14±2.39 <sup>b</sup>  | 13.8±1.29 <sup>a</sup>  | 8.94±0.470 <sup>b</sup>  | 10.2±1.49 <sup>ab</sup> | 0.0031             |         |
| <b>20:3n3</b>      | 0.48±0.1 <sup>B</sup>   | 0.87±0.29                | 2.35±1.91 <sup>A</sup>  | 5.49±2.14               | 0.81±0.1 <sup>AB</sup>   | 2.65±1.11               | 0.0371             | 0.0125  |
| <b>20:3n6</b>      | 16±1.44 <sup>b</sup>    | 27.4±4.65 <sup>a</sup>   | 10.7±1.52 <sup>c</sup>  | 14.5±1.98 <sup>bc</sup> | 20.02±0.97 <sup>ba</sup> | 16.5±3.21 <sup>bc</sup> | 0.0413             |         |
| <b>20:4n6</b>      | 884±117                 | 605±68.3                 | 591±60.7                | 602±105                 | 885±91.7                 | 594±107                 |                    | 0.0208  |
| <b>20:5n3</b>      | 11.0±1.55 <sup>A</sup>  | 10.5±1.81                | 2.82±0.460 <sup>B</sup> | 1.93±0.23               | 13.6±0.85 <sup>A</sup>   | 6.83±1.03               | <0.0001            | 0.0063  |
| <b>22:0</b>        | 6.41±0.32 <sup>B</sup>  | 7.48±0.38                | 6.33±0.87 <sup>B</sup>  | 8.06±0.82               | 10.7±0.55 <sup>A</sup>   | 10.3±1.77               | 0.0006             |         |
| <b>22:1</b>        | 0.910±0.06              | 0.770±0.200              | 0.640±0.120             | 0.330±0.270             | 0.870±0.0800             | 0.540±0.110             |                    |         |
| <b>22:2n6</b>      | 0.700±0.660             | 0.480±0.380              | 0.110±0.0800            | 0.160±0.160             | 0.770±0.660              | 0.120±0.0800            |                    |         |
| <b>22:4n6</b>      | 6.96±0.410 <sup>B</sup> | 9.91±0.59                | 23.2±4.32 <sup>A</sup>  | 23.3±4.08               | 7.82±0.63 <sup>B</sup>   | 12.8±1.86               | <0.0001            | 0.0155  |
| <b>22:5n3</b>      | 5.21±0.66 <sup>B</sup>  | 10.2±1.01                | 5.55±0.93 <sup>B</sup>  | 7.43±1.02               | 9.3±0.62 <sup>A</sup>    | 12.6±1.79               | 0.0017             | 0.0009  |
| <b>22:5n6</b>      | 20.5±2.17 <sup>A</sup>  | 18.1±2.78                | 13.9±1.41 <sup>A</sup>  | 23.8±3.43               | 11.9±1.15 <sup>B</sup>   | 11.2±3.07               | 0.0064             |         |
| <b>22:6n3</b>      | 152±18.0 <sup>A</sup>   | 79.7±5.78                | 84.5±11.8 <sup>B</sup>  | 59.4±10.1               | 173±16.8 <sup>A</sup>    | 68.4±9.55               | 0.0018             | <0.0001 |
| <b>24:0</b>        | 12.1±1.73               | 10.7±0.600               | 11.3±1.35               | 10.8±1.57               | 13.4±0.43                | 10.6±1.95               |                    |         |
| <b>24:1</b>        | 12.7±0.94               | 13.8±1.81                | 8.45±0.73               | 11.1±1.57               | 10.4±1.31                | 12.8±4.06               |                    |         |
| <b>n6/n3 ratio</b> | 7.35±0.515 <sup>B</sup> | 9.50±0.581               | 11.9±0.461 <sup>A</sup> | 14.9±0.811              | 7.48±0.221 <sup>B</sup>  | 8.94±0.717              | <0.0001            | 0.0001  |

†P values listed across diet and sex effects are the P value for a diet x sex interaction when there was a significant interaction or the P value for the Wilcoxin test if the data were not normally distributed.

Differing UPPER case superscript letters shown on the female values within a row indicated differences between diets. Differing lower case superscript letters within a row indicate differences between means.

Values are mean±SE (n=5-6).



**Supplemental Table S11.** Oxylin/PUFA ratios for enzymes in kidney, liver and serum in rats given control, LA and LA+ALA diets for six weeks

A. COX-PGE synthase

| Tissue | Diet    | PGE <sub>2</sub> /AA   |                        | PGE <sub>1</sub> /DGLA |           | PGE <sub>3</sub> /EPA  |                     | Effect | Sex     |
|--------|---------|------------------------|------------------------|------------------------|-----------|------------------------|---------------------|--------|---------|
|        |         | Female                 | Male                   | Female                 | Male      | Female                 | Male                |        |         |
| Kidney | Control | 8.37±1.46 <sup>C</sup> | 8.12±1.41              | 24.3±5.35 <sup>B</sup> | 27.0±4.11 | 90.3±18.7 <sup>A</sup> | 135±28              | <.0001 |         |
|        | LA      | 9.75±1.04 <sup>C</sup> | 8.38±1.27              | 38.9±2.88 <sup>B</sup> | 41.7±5.98 | 178±46.3 <sup>A</sup>  | 267±33              | <.0001 |         |
|        | LA+ALA  | 8.80±2.61 <sup>C</sup> | 7.86±1.13              | 33.7±9.03 <sup>B</sup> | 39.5±6.53 | 200±101 <sup>A</sup>   | 195±23.9            | <.0001 |         |
| Liver  | Control | 7.01±1.53 <sup>c</sup> | 14.1±1.54 <sup>c</sup> |                        |           | 49.1±17.7 <sup>b</sup> | 272±44 <sup>a</sup> |        | 0.0271† |
|        | LA      | 8.46±1.72 <sup>B</sup> | 10.1±0.70              |                        |           | 286±88 <sup>A</sup>    | 441±123             | <.0001 |         |
|        | LA+ALA  | 5.67±0.85 <sup>B</sup> | 11.7±1.95              |                        |           | 78.1±16 <sup>A</sup>   | 310±57.3            | <.0001 | <.0001  |
| Serum  | Control | 3.85±1.09              | 10.5±3.04              |                        |           |                        |                     |        | 0.0491  |
|        | LA      | 7.00±2.66              | 13.5±5.38              |                        |           |                        |                     |        |         |
|        | LA+ALA  | 5.03±2.81              | 8.17±1.71              |                        |           |                        |                     |        |         |

B. 5-LOX

| Tissue | Diet    | 5-HETE/AA              |                        | 9-HODE/LA              |                       | 9-HOTrE/ALA             |                        | 5-HEPE/EPA             |                        | 7-HDoHE/DHA            |                         | Effect | Sex    |
|--------|---------|------------------------|------------------------|------------------------|-----------------------|-------------------------|------------------------|------------------------|------------------------|------------------------|-------------------------|--------|--------|
|        |         | Female                 | Male                   | Female                 | Male                  | Female                  | Male                   | Female                 | Male                   | Female                 | Male                    |        |        |
| Kidney | Control | 111±12.5 <sup>ef</sup> | 161±17.4 <sup>c</sup>  | 1010±96.2 <sup>c</sup> | 1070±168 <sup>c</sup> | 3200±749 <sup>b</sup>   | 8910±2020 <sup>a</sup> | 649±132 <sup>d</sup>   | 1400±105 <sup>c</sup>  | 68.6±9.52 <sup>g</sup> | 86.5±6.68 <sup>fg</sup> | 0.0086 |        |
|        | LA      | 49.2±0.32 <sup>C</sup> | 77.7±0.55              | 400±164 <sup>B</sup>   | 617±176               | 954±3.58 <sup>A</sup>   | 3400±4.11              | 706±6.92 <sup>B</sup>  | 844±1.8                | 33.1±0.44 <sup>D</sup> | 173±2.17                | <.0001 | 0.0438 |
|        | LA+ALA  | 160±22.7 <sup>C</sup>  | 182±21.5               | 1610±334 <sup>B</sup>  | 2110±376              | 3480±688 <sup>A</sup>   | 9290±2590              | 874±115 <sup>B</sup>   | 2030±508               | 129±19.6 <sup>C</sup>  | 113±6.3                 | <.0001 | 0.0016 |
| Liver  | Control | 1.07±0.44 <sup>E</sup> | 2.07±0.47              | 751±164 <sup>B</sup>   | 980±176               | 7860±2250 <sup>A</sup>  | 10400±2400             | 188±45.9 <sup>C</sup>  | 568±195                | 19.8±4.01 <sup>D</sup> | 31.4±3.32               | <.0001 | 0.0009 |
|        | LA      | 62.2±16.7 <sup>D</sup> | 83.4±7.29              | 1440±381 <sup>B</sup>  | 1330±173              | 4720±1220 <sup>A</sup>  | 10300±2000             | 612±178 <sup>C</sup>   | 872±200                | 31.6±11.0 <sup>E</sup> | 42.5±11.6               | <.0001 | 0.0275 |
|        | LA+ALA  | 41.1±6.47 <sup>D</sup> | 86.6±19.3              | 891±196 <sup>B</sup>   | 1530±362              | 14300±3870 <sup>A</sup> | 22100±6250             | 187±37.9 <sup>C</sup>  | 530±101                | 16.2±1.14 <sup>E</sup> | 40.4±8.85               | <.0001 | <.0001 |
| Serum  | Control | 2.41±0.32 <sup>d</sup> | 5.55±0.55 <sup>c</sup> | 25.6±6.92 <sup>a</sup> | 24.1±1.8 <sup>a</sup> | 18.8±3.58 <sup>ba</sup> | 21.9±4.11 <sup>a</sup> | 4.97±0.44 <sup>c</sup> | 13.7±2.17 <sup>b</sup> | 1.33±0.14 <sup>e</sup> | 1.87±0.26 <sup>ed</sup> |        | 0.0065 |
|        | LA      | 4.36±1.00 <sup>B</sup> | 8.85±1.94              | 31.4±9.03 <sup>A</sup> | 29.6±7.65             | 37.2±11.9 <sup>A</sup>  | 33.2±13.9              | 29.6±10.4 <sup>A</sup> | 51.1±6.84              | 1.98±0.54 <sup>C</sup> | 2.37±0.48               | <.0001 |        |
|        | LA+ALA  | 2.10±0.08 <sup>B</sup> | 8.60±2.06              | 9.60±1.85 <sup>A</sup> | 16.2±3.76             | 14.7±4.99 <sup>A</sup>  | 17.7±5.92              | 6.00±1.22 <sup>A</sup> | 22.4±3.85              | 1.79±0.77 <sup>C</sup> | 2.62±0.52               | <.0001 | <.0001 |

## C. 12-LOX

| Tissue | Diet    | 12-HETE/AA             |           | 12-HEPE/EPA           |          | 14-HDoHE/DHA           |           | Effect | Sex    |
|--------|---------|------------------------|-----------|-----------------------|----------|------------------------|-----------|--------|--------|
|        |         | Female                 | Male      | Female                | Male     | Female                 | Male      |        |        |
| Kidney | Control | 41.2±2.25 <sup>B</sup> | 61.0±6.67 | 222±26.3 <sup>A</sup> | 420±38.7 | 282±31.7 <sup>A</sup>  | 386±56.4  | <.0001 | 0.0001 |
|        | LA      | 78.3±16.8 <sup>B</sup> | 97.8±11.1 | 512±132 <sup>A</sup>  | 947±222  | 372±37.7 <sup>A</sup>  | 607±104   | <.0001 | 0.0069 |
|        | LA+ALA  | 98.0±25.1 <sup>B</sup> | 106±20.0  | 464±95.0 <sup>A</sup> | 901±108  | 780±198 <sup>A</sup>   | 662±100   | <.0001 |        |
| Liver  | Control | 168±36.5 <sup>B</sup>  | 187±44.3  | 927±85.2 <sup>A</sup> | 920±209  | 148±35.6 <sup>B</sup>  | 184±32.5  | <.0001 |        |
|        | LA      | 92.0±43.3 <sup>B</sup> | 138±20.6  | 2540±958 <sup>A</sup> | 2020±451 | 161±66.3 <sup>B</sup>  | 142±22.9  | <.0001 |        |
|        | LA+ALA  | 140±23.1 <sup>B</sup>  | 217±63.5  | 986±253 <sup>A</sup>  | 1990±697 | 121±13.2 <sup>B</sup>  | 219±41.3  | <.0001 | 0.025  |
| Serum  | Control | 140±34.9 <sup>A</sup>  | 279±41.9  | 194±47.6 <sup>A</sup> | 523±153  | 27.9±6.63 <sup>B</sup> | 63.0±12.9 | <.0001 | 0.0002 |
|        | LA      | 247±63.4 <sup>B</sup>  | 305±60.1  | 909±339 <sup>A</sup>  | 1190±191 | 47.2±13.0 <sup>C</sup> | 63.2±10.4 | <.0001 |        |
|        | LA+ALA  | 102±15.3 <sup>B</sup>  | 289±41.9  | 217±35.7 <sup>A</sup> | 761±132  | 18.5±2.63 <sup>C</sup> | 63.8±14.8 | <.0001 | <.0001 |

## D.15-LOX

| Tissue | Diet    | 15-HETE/AA             |                           | 13-HODE/LA              |                          | 15-HETrE/DGLA            |                         | 13-HOTrE/ALA             |                           | 15-HEPE/EPA             |                          | 17-HDoHE/DHA             |                         | Ratio  | Sex    |
|--------|---------|------------------------|---------------------------|-------------------------|--------------------------|--------------------------|-------------------------|--------------------------|---------------------------|-------------------------|--------------------------|--------------------------|-------------------------|--------|--------|
|        |         | Female                 | Male                      | Female                  | Male                     | Female                   | Male                    | Female                   | Male                      | Female                  | Male                     | Female                   | Male                    |        |        |
| Kidney | Control | 114±10.7 <sup>g</sup>  | 122±30.7 <sup>g</sup>     | 557±85.1 <sup>dc</sup>  | 681±113 <sup>c</sup>     | 374±13.2 <sup>de</sup>   | 303 ±29.7 <sup>fe</sup> | 1530±257 <sup>b</sup>    | 3760±960 <sup>a</sup>     | 219±20.2 <sup>f</sup>   | 376±41.5 <sup>de</sup>   | 453±71.3 <sup>dce</sup>  | 490±86.1 <sup>dce</sup> | 0.0331 |        |
|        | LA      | 209±12.8 <sup>D</sup>  | 227±43.3                  | 1230±89.5 <sup>B</sup>  | 1300±185                 | 579±30.7 <sup>C</sup>    | 558±104                 | 2150±336 <sup>A</sup>    | 4480±957                  | 516±41.6 <sup>C</sup>   | 698±75.7                 | 652±77.9 <sup>C</sup>    | 1120±348                | <.0001 |        |
|        | LA+ALA  | 157±29.4 <sup>D</sup>  | 167±32.4                  | 992±192 <sup>B</sup>    | 1440±298                 | 508±94.2 <sup>C</sup>    | 611±133                 | 2420±424 <sup>A</sup>    | 6090±1610                 | 358±16.5 <sup>C</sup>   | 693±98.8                 | 1360±422 <sup>B</sup>    | 825±167                 | <.0001 | 0.0221 |
| Liver  | Control | 79.1±19.1 <sup>h</sup> | 189±38.3 <sup>gf</sup>    | 332±85.2 <sup>ef</sup>  | 463±91.6 <sup>cd</sup>   | 971±207 <sup>abc</sup>   | 656±174 <sup>bcd</sup>  | 1050±170 <sup>ab</sup>   | 1810±412 <sup>a</sup>     | 549±28.9 <sup>bcd</sup> | 544±104 <sup>cde</sup>   | 104±16.6 <sup>gh</sup>   | 200±25.6 <sup>f</sup>   | 0.0465 |        |
|        | LA      | 88.5±13.8 <sup>e</sup> | 101±8.43 <sup>e</sup>     | 725±198 <sup>cd</sup>   | 548±80.5 <sup>d</sup>    | 1560±573 <sup>bcd</sup>  | 666±134 <sup>cd</sup>   | 12300±3830 <sup>a</sup>  | 1860±235 <sup>b</sup>     | 1220±429 <sup>cd</sup>  | 1580±444 <sup>cb</sup>   | 189±54.1 <sup>e</sup>    | 191±34.3 <sup>e</sup>   | 0.0057 |        |
|        | LA+ALA  | 85.2±12.4 <sup>D</sup> | 136±25.4                  | 380±78.9 <sup>B</sup>   | 636±147                  | 695±122 <sup>B</sup>     | 600±201                 | 2230±393 <sup>A</sup>    | 3570±970                  | 572±178 <sup>B</sup>    | 1300±529                 | 154±29.4 <sup>C</sup>    | 304±35.2                | <.0001 | 0.0012 |
| Serum  | Control | 9.11±2.24 <sup>d</sup> | 23.4±3.74 <sup>bc</sup>   | 15.6±4.02 <sup>c</sup>  | 16.2±1.66 <sup>c</sup>   | 23.5±4.53 <sup>bc</sup>  | 42.6±12 <sup>ba</sup>   | 35.2±10.0 <sup>b</sup>   | 33.8±7.26 <sup>b</sup>    | 5.69±0.82 <sup>d</sup>  | 14.9±1.81 <sup>c</sup>   | 22.4±3.02 <sup>bc</sup>  | 58.9±7.05 <sup>a</sup>  | 0.0253 |        |
|        | LA      | 14.8±4.28 <sup>e</sup> | 27.7±7.87 <sup>bdec</sup> | 20.7±5.79 <sup>de</sup> | 18.8±4.45 <sup>dec</sup> | 49.6±15.7 <sup>bac</sup> | 58.2±12.3 <sup>ba</sup> | 49.7±15.9 <sup>bac</sup> | 42.1±16.2 <sup>bdac</sup> | 16.4±4.9 <sup>e</sup>   | 40.7±7.14 <sup>bac</sup> | 37.6±4.96 <sup>bac</sup> | 71.9±10.9 <sup>a</sup>  | 0.0003 | 0.0102 |
|        | LA+ALA  | 11.9±5.91 <sup>B</sup> | 23.0±3.32                 | 7.04±1.32 <sup>B</sup>  | 23.1±10.8                | 12.0±4.07 <sup>B</sup>   | 42.4±7.77               | 14.1±7.62 <sup>B</sup>   | 24.1±6.17                 | 9.30±4.30 <sup>B</sup>  | 27.1±5.49                | 37.6±6.17 <sup>A</sup>   | 80.9±14.8               | <.0001 | <.0001 |

### E. CYP Hydroxylase

| Tissue | Diet    | 18-HETE/AA             |                        | 18-HEPE/EPA            |                       | 20-HDoHE/DHA           |                        | Effect | Sex    |
|--------|---------|------------------------|------------------------|------------------------|-----------------------|------------------------|------------------------|--------|--------|
|        |         | Female                 | Male                   | Female                 | Male                  | Female                 | Male                   |        |        |
| Kidney | Control | 0.52±0.10 <sup>B</sup> | 0.41±0.08              | 603±104 <sup>A</sup>   | 787±127               | 760±102 <sup>A</sup>   | 990±110                | <.0001 |        |
|        | LA      | 0.52±0.12 <sup>B</sup> | 0.59±0.05              | 1440±119 <sup>A</sup>  | 1000±187              | 934±140 <sup>A</sup>   | 1130±188               | <.0001 |        |
|        | LA+ALA  | 0.53±0.07 <sup>C</sup> | 0.49±0.07 <sup>C</sup> | 869±116 <sup>b</sup>   | 1600±260 <sup>a</sup> | 1640±316 <sup>a</sup>  | 1180±116 <sup>ab</sup> | 0.0246 |        |
| Liver  | Control | 1.01±0.23 <sup>B</sup> | 2.95±0.74              | 161±35.4 <sup>A</sup>  | 408±149               | 104±28.4 <sup>A</sup>  | 251±47.9               | <.0001 | 0.0003 |
|        | LA      | 2.95±1.19 <sup>C</sup> | 2.34±0.87              | 636±115 <sup>A</sup>   | 508±117               | 144±51.7 <sup>B</sup>  | 215±32.1               | <.0001 |        |
|        | LA+ALA  | 0.88±0.22 <sup>C</sup> | 1.97±0.67              | 136±11.1 <sup>A</sup>  | 464±106               | 99.1±7.25 <sup>B</sup> | 256±54.8               | <.0001 | <.0001 |
| Serum  | Control | 0.16±0.02 <sup>C</sup> | 0.29±0.04              | 5.42±0.56 <sup>A</sup> | 11.0±1.89             | 3.13±0.29 <sup>B</sup> | 6.79±1.31              | <.0001 | <.0001 |
|        | LA      | 0.36±0.10 <sup>C</sup> | 0.53±0.08              | 21.9±10.0 <sup>A</sup> | 33.5±7.80             | 6.57±2.24 <sup>B</sup> | 8.81±1.42              | <.0001 | 0.0145 |
|        | LA+ALA  | 0.18±0.03 <sup>C</sup> | 0.82±0.25              | 5.39±0.84 <sup>A</sup> | 28.9±6.67             | 3.26±0.35 <sup>B</sup> | 10.1±2.36              | <.0001 | <.0001 |

### F. CYP Epoxygenase

| Tissue | Diet    | 5,6-DiHETE/AA          |                        | 12,13-DiHOME/LA         |                        | 12,13-DiHODE/ALA         |                        | 19,20-DiHDoPE/DHA       |                        | Effect | Sex    |
|--------|---------|------------------------|------------------------|-------------------------|------------------------|--------------------------|------------------------|-------------------------|------------------------|--------|--------|
|        |         | Female                 | Male                   | Female                  | Male                   | Female                   | Male                   | Female                  | Male                   |        |        |
| Kidney | Control | 1800±320 <sup>C</sup>  | 2280±500               | 10800±2230 <sup>B</sup> | 8870±1780              | 65500±16000 <sup>A</sup> | 167000±50900           | 18800±6670 <sup>B</sup> | 14200±2640             | <.0001 |        |
|        | LA      | 2710±1060 <sup>C</sup> | 3330±760               | 10200±900 <sup>B</sup>  | 12500±1580             | 59900±14100 <sup>A</sup> | 61200±12800            | 12100±820 <sup>B</sup>  | 14500±1790             | <.0001 |        |
|        | LA+ALA  | 2240±660 <sup>D</sup>  | 3020±820               | 10200±1440 <sup>C</sup> | 14900±3850             | 74900±7700 <sup>A</sup>  | 179000±53900           | 24200±5890 <sup>B</sup> | 15000±1440             | <.0001 |        |
| Liver  | Control | 3740±1400 <sup>C</sup> | 12200±2790             | 32000±8080 <sup>A</sup> | 121000±23800           |                          |                        | 12200±2750 <sup>B</sup> | 68800±11200            | <.0001 | <.0001 |
|        | LA      | 3090±410 <sup>C</sup>  | 14500±3280             | 43600±9870 <sup>A</sup> | 157000±42500           |                          |                        | 11400±1850 <sup>B</sup> | 53400±9670             | <.0001 | <.0001 |
|        | LA+ALA  | 2240±290 <sup>C</sup>  | 12000±1980             | 31400±4220 <sup>A</sup> | 115000±21000           |                          |                        | 10900±1160 <sup>B</sup> | 54000±8450             | <.0001 | <.0001 |
| Serum  | Control | 430±80 <sup>e</sup>    | 1780±370 <sup>d</sup>  | 2440±410 <sup>bcd</sup> | 2260±580 <sup>cd</sup> | 4240±1220 <sup>a</sup>   | 3090±570 <sup>cd</sup> | 3290±560 <sup>bc</sup>  | 5680±1290 <sup>a</sup> | 0.0006 |        |
|        | LA      | 950±210 <sup>c</sup>   | 2540±550 <sup>b</sup>  | 3860±800 <sup>ab</sup>  | 2530±580 <sup>b</sup>  | 6960±2170 <sup>a</sup>   | 4500±960 <sup>ab</sup> | 4390±1300 <sup>ab</sup> | 5940±890 <sup>a</sup>  | 0.0407 |        |
|        | LA+ALA  | 200±100 <sup>d</sup>   | 2680±1010 <sup>c</sup> | 3360±930 <sup>bc</sup>  | 2120±730 <sup>c</sup>  | 58800±22400 <sup>a</sup> | 1740±500 <sup>c</sup>  | 1170±380 <sup>c</sup>   | 9430±1710 <sup>b</sup> | <.0001 |        |

†P values listed across ratio and sex effects are the P value for a ratio x sex interaction when there was a significant interaction or the P value for the Wilcoxin test if the data were not normally distributed.

Differing UPPER case superscript letters shown on the female values within a row indicate differences between oxylipin/PUFA ratios.

Differing lower case superscript letters within a row indicate differences between means.

Values are mean±SE (n=4-6); FA, fatty acid
